# Supplementary material for: Organocatalytic asymmetric allylic alkylation of 2-methyl-3-nitroindoles: a route to direct enantioselective functionalization of indole C(sp3)–H bonds
Source: Royal Society of Chemistry journal article supplement (doi:10.1039/d1ob00048a), 2021-01-01
Supplement: d1ob00048a2.pdf [file d1ob00048a2.pdf]

## Electronic Supplementary Information

### Organocatalytic asymmetric allylic alkylation of 2-methyl-3-nitroindoles: a route to direct enantioselective functionalization of indole C(sp<sup>3</sup>)-H Bonds

Jing-Xiang Xu,<sup>a</sup> Kai-Ti Chu<sup>b</sup>, Ming-Hsi Chiang<sup>b</sup> and JengL-Liang Han,<sup>\*a</sup>

<sup>a</sup>*Department of Chemistry, National Chung Hsing University, Taichung City, 40227, Taiwan R.O.C.*

<sup>b</sup>*Institute of Chemistry, Academia Sinica, Taipei City, 11529, Taiwan R.O.C.*

[jlhan@nchu.edu.tw](mailto:jlhan@nchu.edu.tw)

#### Table of Contents:

|                                                          |            |
|----------------------------------------------------------|------------|
| <b>1. General Experimental Details</b>                   | <b>S2</b>  |
| <b>2. General Procedure for the Synthesis of 3 and 5</b> | <b>S2</b>  |
| <b>3. Characterization Data</b>                          | <b>S3</b>  |
| <b>4. Computational methods</b>                          | <b>S13</b> |
| <b>5. References</b>                                     | <b>S17</b> |
| <b>6. Copies of HPLC Spectra of Products</b>             | <b>S18</b> |

## 1. General Experimental Details.

All commercially available reagents were used without further purification unless otherwise stated. All reaction solvents were purified before use. Proton nuclear magnetic resonance ( $^1\text{H}$  NMR) spectra were recorded on a commercial instrument at 400 MHz. Carbon-13 nuclear magnetic resonance ( $^{13}\text{C}$  NMR) spectra were recorded at 100 MHz. The proton signal for residual non-deuterated solvent ( $\delta$  7.26 for  $\text{CHCl}_3$ ) was used as an internal reference for  $^1\text{H}$  NMR spectra. For  $^{13}\text{C}$  NMR spectra, chemical shifts are reported relative to the  $\delta$ 77.0 resonance of  $\text{CHCl}_3$ . Coupling constants are reported in Hz. Optical rotations were recorded on an RUDOLPH/Autopol IV polarimeter. Melting points were determined on a BUCHI B-545 melting point apparatus and are uncorrected. High resolution mass spectra were recorded on a commercial high resolution mass spectrometer Analytical thin layer chromatography (TLC) was performed on Kieselgel 60 F254 glass plates precoated with a 0.25 mm thickness of silica gel. The TLC plates were visualized with UV light and/or by staining with Hanessian solution (ceric sulfate and ammonium molybdate in aqueous sulfuric acid). Column chromatography was generally performed using Kieselgel 60 (230-400 mesh) silica gel, typically using a 50-100:1 weight ratio of silica gel to crude product. The ee values determination was carried out using chiral high-performance liquid chromatography (HPLC) with Daicel chiral columns on JASCO with a UV-4075 detector. The HPLC spectra of racemic mixtures were synthesized using DABCO as a catalyst. Catalyst **4a** was purchased from Biosynth Carbosynth. Catalysts **4b-g** were purchased from Shanghai Chiral bio-compound Co., Ltd. 3-Nitro-2-methylindoles **1**<sup>1</sup> and MBH carbonates **2**<sup>2</sup> were prepared according to literature procedures.

## 2. General Procedure for the Synthesis of **3** and **5**

To a solution of MBH carbonates **2** (0.1 mmol) and catalyst **4f** (0.015 mmol) in anhydrous  $\text{CH}_2\text{Cl}_2$  was added 3-Nitro-2-methylindoles **1** (0.15 mmol) at room temperature. The reaction mixture was stirred at room temperature for 48 h. After completion of the reaction, the reaction solution was concentrated in vacuum and the crude was purified by silica gel flash chromatography (Hexanes/EA 10:1 to 5:1) to afford the pure products. The enantiomeric ratio was determined by HPLC on a chiral stationary phase.

### 3. Characterization Data

#### ***tert*-Butyl (*R*)-2-(3-(methoxycarbonyl)-2-phenylbut-3-en-1-yl)-3-nitro-1*H*-indole-1-carboxylate (**3a**).**

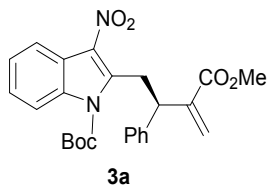

Yellow oil; Yield : 72%;  $[\alpha]_{\text{D}}^{30}$ :  $-83.7$  ( $c = 1.00$ ,  $\text{CH}_2\text{Cl}_2$ );  $^1\text{H}$  NMR (400 MHz,  $\text{CDCl}_3$ )  $\delta$  8.17 – 8.14 (m, 1H), 8.04 – 8.00 (m, 1H), 7.38 – 7.35 (m, 2H), 7.17 – (m, 3H), 7.09 – 7.06 (m, 2H), 6.39 (s, 1H), 5.86 (s, 1H), 4.41 – 4.22 (m, 3H), 3.51 (s, 3H), 1.68 (s, 9H);  $^{13}\text{C}$  NMR (101 MHz,  $\text{CDCl}_3$ ):  $\delta$  166.7, 149.1, 142.7, 142.1, 140.4, 133.9, 128.4, 127.6, 127.0, 125.9, 125.2, 125.0, 121.3, 120.6, 114.9, 86.9, 51.9, 45.9, 30.9, 28.0; HRMS (ESI): caclcd for  $\text{C}_{25}\text{H}_{26}\text{N}_2\text{O}_6\text{Na}$   $[\text{M}+\text{Na}]^+$ : 473.1683; found: 473.1682; HPLC analysis: *er* = 92:8 on an AD-H column: hexane/*i*-PrOH = 80:20, flow rate = 0.8 mL/min,  $\lambda = 220$  nm;  $t_{\text{minor}} = 5.23$  min,  $t_{\text{major}} = 5.72$  min.

#### ***tert*-Butyl (*S*)-2-(2-(2-bromophenyl)-3-(methoxycarbonyl)but-3-en-1-yl)-3-nitro-1*H*-indole-1-carboxylate (**3b**).**

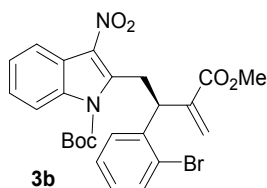

Yellow solid; Yield : 88%;  $[\alpha]_{\text{D}}^{30}$ :  $-67.7$  ( $c = 1.55$ ,  $\text{CH}_2\text{Cl}_2$ ); mp: 115-116°C;  $^1\text{H}$  NMR (400 MHz,  $\text{CDCl}_3$ ): 8.12 (d,  $J = 7.9$  Hz, 1H), 8.07 (d,  $J = 7.7$  Hz, 1H), 7.40 – 7.20 (m, 5H), 6.98 (t,  $J = 7.6$  Hz, 1H), 6.43 (s, 1H), 5.80 (s, 1H), 4.96 – 4.88 (m, 1H), 4.40 – 4.29 (m, 1H), 4.21 (dd,  $J = 12.9, 5.9$  Hz, 1H), 3.47 (s, 3H), 1.67 (s, 9H);  $^{13}\text{C}$  NMR (101 MHz,  $\text{CDCl}_3$ ):  $\delta$  166.3, 149.2, 142.1, 141.2, 139.5, 134.2, 132.6, 132.2, 129.0, 128.4, 127.5, 126.0, 125.6, 125.0, 124.9, 121.4, 120.4, 115.4, 86.8, 51.8, 43.9, 30.5, 28.0 ; HRMS (ESI): caclcd for  $\text{C}_{25}\text{H}_{25}\text{N}_2\text{O}_6\text{NaBr}$   $[\text{M}+\text{Na}]^+$ : 551.0788; found: 551.0788; HPLC analysis: *er* = 95:5 on an IF column: hexane/*i*-PrOH = 80:20, flow rate = 0.8 mL/min,  $\lambda = 220$  nm;  $t_{\text{major}} = 12.38$  min,  $t_{\text{minor}} = 13.03$  min.

***tert*-Butyl (*R*)-2-(2-(3-bromophenyl)-3-(methoxycarbonyl)but-3-en-1-yl)-3-nitro-1*H*-indole-1-carboxylate (**3c**).**

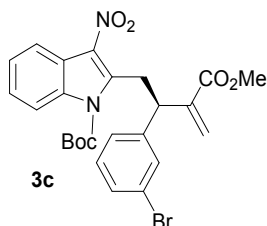

Yellow solid; Yield : 79%;  $[\alpha]_{\text{D}}^{30}$ :  $-97.3$  ( $c = 2.09$ ,  $\text{CH}_2\text{Cl}_2$ ); mp:  $122\text{-}123^\circ\text{C}$ ;  $^1\text{H}$  NMR (400 MHz,  $\text{CDCl}_3$ ):  $\delta$  8.16 (dd,  $J = 6.0, 3.1$  Hz, 1H), 7.99 (dd,  $J = 6.0, 3.3$  Hz, 1H), 7.37 (dd,  $J = 6.1, 3.1$  Hz, 2H), 7.27 – 7.23 (m, 2H), 7.07 – 6.91 (m, 2H), 6.40 (s, 1H), 5.84 (s, 1H), 4.39 – 4.16 (m, 3H), 3.51 (s, 3H), 1.67 (s, 9H);  $^{13}\text{C}$  NMR (101 MHz,  $\text{CDCl}_3$ ):  $\delta$  166.0, 148.7, 142.7, 142.0, 141.1, 133.5, 131.7, 130.3, 129.8, 129.5, 126.1, 125.7, 125.5, 124.8, 122.1, 120.9, 120.3, 114.7, 86.8, 51.6, 45.3, 30.4, 27.6; HRMS (ESI): calcd for  $\text{C}_{25}\text{H}_{25}\text{N}_2\text{O}_6\text{NaBr}$   $[\text{M}+\text{Na}]^+$ : 551.0788; found: 551.0783; HPLC analysis: *er* = 92:8 on an AS-H column: hexane/*i*-PrOH = 80:20, flow rate = 0.5 mL/min,  $\lambda = 220$  nm;  $t_{\text{minor}} = 11.35$  min,  $t_{\text{major}} = 14.70$  min.

***tert*-Butyl (*R*)-2-(2-(4-bromophenyl)-3-(methoxycarbonyl)but-3-en-1-yl)-3-nitro-1*H*-indole-1-carboxylate (**3d**).**

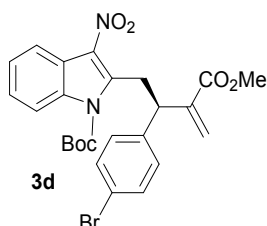

Yellow solid; Yield : 78%;  $[\alpha]_{\text{D}}^{30}$ :  $-132.6$  ( $c = 1.72$ ,  $\text{CH}_2\text{Cl}_2$ ); mp:  $116\text{-}117^\circ\text{C}$ ;  $^1\text{H}$  NMR (400 MHz,  $\text{CDCl}_3$ ):  $\delta$  8.17 (dd,  $J = 6.4, 2.8$  Hz, 1H), 7.97 (dd,  $J = 6.6, 2.8$  Hz, 1H), 7.36 (dd,  $J = 6.2, 3.2$  Hz, 2H), 7.27 (d,  $J = 8.4$  Hz, 2H), 6.93 (d,  $J = 8.4$  Hz, 2H), 6.39 (s, 1H), 5.84 (s, 1H), 4.39 – 4.25 (m, 2H), 4.20 – 4.19 (m, 1H), 3.51 (s, 3H), 1.65 (s, 9H);  $^{13}\text{C}$  NMR (101 MHz,  $\text{CDCl}_3$ ):  $\delta$  166.4, 149.0, 142.5, 141.7, 139.6, 133.8, 131.9, 131.4, 129.4, 126.1, 125.4, 125.1, 121.2, 120.8, 120.6, 115.0, 87.0, 51.9, 45.5, 30.6, 27.9; HRMS (ESI): calcd for  $\text{C}_{25}\text{H}_{25}\text{N}_2\text{O}_6\text{NaBr}$   $[\text{M}+\text{Na}]^+$ : 551.0788; found: 551.0780; HPLC analysis: *er* = 95.5:4.5 on an AD-H column: hexane/*i*-PrOH = 80:20, flow rate = 0.5 mL/min,  $\lambda = 220$  nm;  $t_{\text{major}} = 9.96$  min,  $t_{\text{minor}} = 10.95$  min.

***tert*-Butyl (R)-2-(2-(4-fluorophenyl)-3-(methoxycarbonyl)but-3-en-1-yl)-3-nitro-1H-indole-1-carboxylate (3e).**

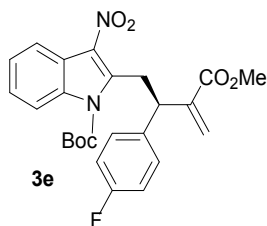

Yellow oil; Yield : 72%;  $[\alpha]_D^{30}$ :  $-31.1$  ( $c = 1.00$ ,  $\text{CH}_2\text{Cl}_2$ );  $^1\text{H}$  NMR (400 MHz,  $\text{CDCl}_3$ ):  $\delta$  8.15 (dd,  $J = 6.2, 3.0$  Hz, 1H), 7.99 (dd,  $J = 6.1, 3.3$  Hz, 1H), 7.42 – 7.28 (m, 2H), 7.03 – 7.00 (m, 2H), 6.82 (t,  $J = 8.7$  Hz, 2H), 6.38 (s, 1H), 5.85 (s, 1H), 4.41 – 4.24 (m, 2H), 4.21–4.14 (m, 1H), 3.51 (s, 3H), 1.66 (s, 9H);  $^{13}\text{C}$  NMR (100 MHz,  $\text{CDCl}_3$ ):  $\delta$  166.6, 161.7 (d,  $J = 246$  Hz), 149.1, 142.6, 142.1, 136.1, 133.9, 132.0, 129.6 (d,  $J = 8.3$  Hz), 129.2 (d,  $J = 8.0$  Hz), 126.0, 125.6, 125.1, 125.1, 121.3, 120.7, 115.5, 115.3, 115.1, 115.0, 87.0, 51.9, 45.3, 30.9, 28.0; HRMS (ESI): cacl'd for  $\text{C}_{25}\text{H}_{25}\text{N}_2\text{O}_6\text{NaF}$   $[\text{M}+\text{Na}]^+$ : 491.1589; found: 491.1584; HPLC analysis:  $er = 94:6$  on an AD-H column: hexane/*i*-PrOH = 80:20, flow rate = 0.5 mL/min,  $\lambda = 220$  nm;  $t_{\text{major}} = 8.97$  min,  $t_{\text{minor}} = 10.23$  min.

***tert*-Butyl (R)-2-(2-(4-chlorophenyl)-3-(methoxycarbonyl)but-3-en-1-yl)-3-nitro-1H-indole-1-carboxylate (3f).**

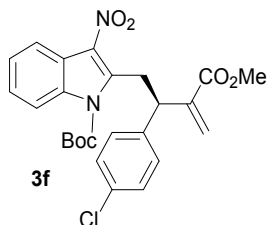

Yellow oil; Yield : 75%;  $[\alpha]_D^{30}$ :  $-65.6$  ( $c = 1.00$ ,  $\text{CH}_2\text{Cl}_2$ );  $^1\text{H}$  NMR (400 MHz,  $\text{CDCl}_3$ ):  $\delta$  8.23 – 8.11 (m, 1H), 8.04 – 7.90 (m, 1H), 7.43 – 7.32 (m, 2H), 7.12 (d,  $J = 8.4$  Hz, 2H), 6.99 (d,  $J = 8.4$  Hz, 2H), 6.39 (s, 1H), 5.85 (s, 1H), 4.42 – 4.26 (m, 2H), 4.25 – 4.12 (m, 1H), 3.51 (s, 3H), 1.66 (s, 9H);  $^{13}\text{C}$  NMR (100 MHz,  $\text{CDCl}_3$ ):  $\delta$  166.5, 149.0, 142.5, 141.8, 139.1, 133.9, 132.7, 131.9, 129.0, 128.7, 128.5, 126.1, 125.3, 125.1, 121.3, 120.7, 115.0, 87.0, 51.9, 45.5, 30.7, 28.0; HRMS (ESI): cacl'd for  $\text{C}_{25}\text{H}_{25}\text{N}_2\text{O}_6\text{Na}^{35}\text{Cl}$   $[\text{M}+\text{Na}]^+$ : 507.1293; found: 507.1296; HPLC analysis:  $er = 96:4$  on an AD-H column: hexane/*i*-PrOH = 80:20, flow rate = 0.5 mL/min,  $\lambda = 220$  nm;  $t_{\text{major}} = 9.61$  min,  $t_{\text{minor}} = 10.72$  min.

***tert*-Butyl (*R*)-2-(3-(methoxycarbonyl)-2-(4-(trifluoromethyl)phenyl)-but-3-en-1-yl)-3-nitro-1*H*-indole-1-carboxylate (**3g**).**

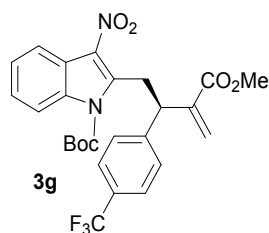

Yellow solid; Yield : 75%;  $[\alpha]_{\text{D}}^{30}$ :  $-99.8$  ( $c = 1.30$ ,  $\text{CH}_2\text{Cl}_2$ ); mp:  $128\text{-}129^\circ\text{C}$ ;  $^1\text{H}$  NMR (400 MHz,  $\text{CDCl}_3$ ):  $\delta$  8.20 – 8.19 (m, 1H), 7.99 – 7.97 (m, 1H), 7.50 – 7.33 (m, 4H), 7.21 (d,  $J = 7.8$  Hz, 2H), 6.45 (s, 1H), 5.91 (s, 1H), 4.48 – 4.44 (m, 1H), 4.39 – 4.26 (m, 2H), 3.54 (s, 3H), 1.67 (s, 9H);  $^{13}\text{C}$  NMR (100 MHz,  $\text{CDCl}_3$ ):  $\delta$  166.3, 149.1, 144.82, 142.4, 141.4, 133.8, 132.0, 128.8 (q,  $J = 32.0$  Hz), 128.1, 126.1, 125.8, 125.3 (d,  $J = 4.0$  Hz), 125.2, 121.2, 120.7, 115.0, 87.1, 52.0, 45.9, 30.6, 27.9; HRMS (ESI): calcd for  $\text{C}_{26}\text{H}_{25}\text{N}_2\text{O}_6\text{NaF}_3$   $[\text{M}+\text{Na}]^+$ : 541.1557; found: 541.1548; HPLC analysis: *er* = 98:2 on an IC column: hexane/*i*-PrOH = 80:20, flow rate = 0.5 mL/min,  $\lambda = 220$  nm;  $t_{\text{major}} = 13.44$  min,  $t_{\text{minor}} = 13.99$  min.

***tert*-Butyl (*R*)-2-(3-(methoxycarbonyl)-2-(*p*-tolyl)but-3-en-1-yl)-3-nitro-1*H*-indole-1-carboxylate (**3h**).**

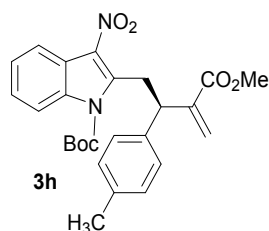

Yellow oil; Yield : 71%;  $[\alpha]_{\text{D}}^{30}$ :  $-89.3$  ( $c = 1.00$ ,  $\text{CH}_2\text{Cl}_2$ );  $^1\text{H}$  NMR (400 MHz,  $\text{CDCl}_3$ ):  $\delta$  8.18 – 8.16 (m, 1H), 8.03 – 8.01 (m, 1H), 7.40 – 7.35 (m, 2H), 6.97 (s, 4H), 6.36 (s, 1H), 5.84 (s, 1H), 4.38 – 4.22 (m, 3H), 3.50 (s, 3H), 2.25 (s, 3H), 1.68 (s, 9H);  $^{13}\text{C}$  NMR (100 MHz,  $\text{CDCl}_3$ ):  $\delta$  166.7, 149.1, 142.9, 142.3, 137.4, 136.4, 133.9, 131.9, 129.1, 127.5, 125.9, 125.0, 121.3, 120.6, 114.9, 86.8, 51.8, 45.5, 30.9, 27.9, 21.0; HRMS (ESI): calcd for  $\text{C}_{26}\text{H}_{28}\text{N}_2\text{O}_6\text{Na}$   $[\text{M}+\text{Na}]^+$ : 487.1839; found: 487.1833; HPLC analysis: *er* = 96:4 on an AD-H column: hexane/*i*-PrOH = 80:20, flow rate = 0.5 mL/min,  $\lambda = 254$  nm;  $t_{\text{major}} = 8.42$  min,  $t_{\text{minor}} = 9.60$  min.

***tert*-Butyl (R)-2-(3-(methoxycarbonyl)-2-(4-methoxyphenyl)but-3-en-1-yl)-3-nitro-1H-indole-1-carboxylate (3i).**

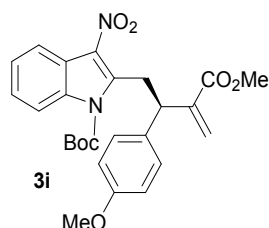

Yellow oil; Yield : 60%;  $[\alpha]_D^{30}$ :  $-87.1$  ( $c = 1.00$ ,  $\text{CH}_2\text{Cl}_2$ );  $^1\text{H}$  NMR (400 MHz,  $\text{CDCl}_3$ ):  $\delta$  8.18 – 8.15 (m, 1H), 8.03 – 8.00 (m, 1H), 7.39 – 7.35 (m, 2H), 6.99 (d,  $J = 8.7$  Hz, 2H), 6.70 (d,  $J = 8.7$  Hz, 2H), 6.35 (s, 1H), 5.83 (s, 1H), 4.36 – 4.20 (m, 3H), 3.72 (s, 3H), 3.51 (s, 3H), 1.68 (s, 9H);  $^{13}\text{C}$  NMR (100 MHz,  $\text{CDCl}_3$ ):  $\delta$  166.7, 158.4, 149.1, 142.9, 142.4, 133.9, 132.4, 131.9, 128.6, 125.9, 125.0, 124.7, 121.3, 120.6, 114.9, 113.7, 86.8, 55.1, 51.8, 45.2, 30.9, 27.9; HRMS (ESI): caclcd for  $\text{C}_{26}\text{H}_{28}\text{N}_2\text{O}_7\text{Na}$   $[\text{M}+\text{Na}]^+$ : 503.1789; found: 503.1789; HPLC analysis:  $er = 93:7$  on an AD-H column: hexane/*i*-PrOH = 80:20, flow rate = 0.5 mL/min,  $\lambda = 254$  nm;  $t_{\text{major}} = 9.99$  min,  $t_{\text{minor}} = 11.50$  min.

***tert*-Butyl (R)-2-(3-(methoxycarbonyl)-2-(naphthalen-2-yl)but-3-en-1-yl)-3-nitro-1H-indole-1-carboxylate (3j).**

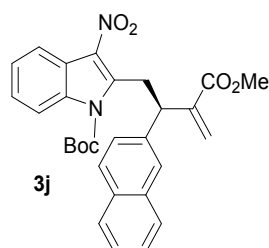

Yellow soild; Yield : 88%;  $[\alpha]_D^{30}$ :  $-136.4$  ( $c = 1.00$ ,  $\text{CH}_2\text{Cl}_2$ ); mp: 126-127°C;  $^1\text{H}$  NMR (400 MHz,  $\text{CDCl}_3$ ):  $\delta$  8.19 – 8.17 (m, 1H), 7.99 – 7.98 (m, 1H), 7.74 – 7.66 (m, 3H), 7.59 (s, 1H), 7.42 – 7.37 (m, 3H), 7.21 (d,  $J = 8.4$  Hz, 1H), 6.43 (s, 1H), 5.90 (s, 1H), 4.61 (t,  $J = 7.7$  Hz, 1H), 4.43 – 4.41 (m, 2H), 3.48 (s, 3H), 1.59 (s, 9H);  $^{13}\text{C}$  NMR (100 MHz,  $\text{CDCl}_3$ ):  $\delta$  166.7, 149.0, 142.9, 142.1, 138.2, 133.9, 133.3, 132.4, 128.0, 127.8, 127.5, 126.2, 126.1, 125.9, 125.6, 125.0, 121.3, 120.6, 114.9, 86.9, 51.9, 45.9, 30.9, 27.8; HRMS (ESI): caclcd for  $\text{C}_{29}\text{H}_{28}\text{N}_2\text{O}_6\text{Na}$   $[\text{M}+\text{Na}]^+$ : 523.1840; found: 523.1844; HPLC analysis:  $er = 92:8$  on an AS-H column: hexane/*i*-PrOH = 80:20, flow rate = 0.5 mL/min,  $\lambda = 220$  nm;  $t_{\text{minor}} = 11.96$  min,  $t_{\text{major}} = 13.38$  min.

***tert*-Butyl (*S*)-2-(3-(methoxycarbonyl)-2-(thiophen-2-yl)but-3-en-1-yl)-3-nitro-1*H*-indole-1-carboxylate (3k).**

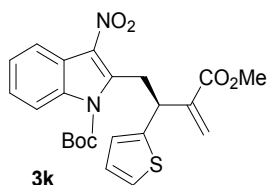

Yellow solid; Yield : 99%;  $[\alpha]_D^{30}$ :  $-53.8$  ( $c = 1.00$ ,  $\text{CH}_2\text{Cl}_2$ ); mp: 128-129°C;  $^1\text{H}$  NMR (400 MHz,  $\text{CDCl}_3$ ):  $\delta$  8.22 – 8.20 (m, 1H), 8.06 – 8.04 (m, 1H), 7.40 – 7.38 (m, 2H), 7.10 (dd,  $J = 5.1, 1.1$  Hz, 1H), 6.86 (dd,  $J = 5.1, 3.5$  Hz, 1H), 6.78 (d,  $J = 3.5$  Hz, 1H), 6.35 (s, 1H), 5.87 (s, 1H), 4.73 (t,  $J = 7.9$  Hz, 1H), 4.36 (d,  $J = 7.9$  Hz, 2H), 3.50 (s, 3H), 1.70 (s, 9H);  $^{13}\text{C}$  NMR (100 MHz,  $\text{CDCl}_3$ ):  $\delta$  166.4, 149.1, 144.4, 142.0, 141.8, 134.0, 132.1, 126.8, 126.2, 126.1, 125.1, 124.8, 124.2, 121.3, 120.6, 115.1, 87.0, 51.9, 40.9, 32.0, 28.0; HRMS (ESI): cacl'd for  $\text{C}_{23}\text{H}_{24}\text{N}_2\text{O}_6\text{NaS}$   $[\text{M}+\text{Na}]^+$ : 479.1247; found: 479.1238; HPLC analysis:  $er = 89:11$  on an AD-H column: hexane/*i*-PrOH = 80:20, flow rate = 0.5 mL/min,  $\lambda = 220$  nm;  $t_{\text{major}} = 8.94$  min,  $t_{\text{minor}} = 9.84$  min.

***tert*-Butyl (*R*)-2-(3-(ethoxycarbonyl)-2-phenylbut-3-en-1-yl)-3-nitro-1*H*-indole-1-carboxylate (3l).**

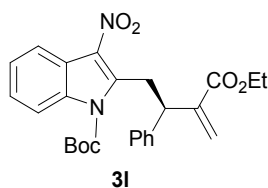

Yellow oil; Yield : 45%;  $[\alpha]_D^{30}$ :  $-65.2$  ( $c = 1.00$ ,  $\text{CH}_2\text{Cl}_2$ );  $^1\text{H}$  NMR (400 MHz,  $\text{CDCl}_3$ ):  $\delta$  8.16 – 8.10 (m, 1H), 8.02 – 8.00 (m, 1H), 7.39 – 7.31 (m, 2H), 7.16 – 7.11 (m, 3H), 7.06 – 7.04 (m, 2H), 6.37 (s, 1H), 5.81 (s, 1H), 4.40 – 4.19 (m, 3H), 3.98 – 3.85 (m, 2H), 1.66 (s, 9H), 1.04 (t,  $J = 7.1$  Hz, 3H);  $^{13}\text{C}$  NMR (100 MHz,  $\text{CDCl}_3$ ):  $\delta$  166.2, 149.1, 142.7, 142.5, 140.6, 134.0, 132.0, 128.3, 127.7, 126.9, 125.9, 125.0, 124.9, 121.3, 120.6, 115.0, 86.9, 60.8, 45.9, 30.9, 28.0, 13.8; HRMS (ESI): cacl'd for  $\text{C}_{26}\text{H}_{28}\text{N}_2\text{O}_6\text{Na}$   $[\text{M}+\text{Na}]^+$ : 487.1840; found: 487.1847; HPLC analysis:  $er = 88:12\%$  on an AD-H column: hexane/*i*-PrOH = 80:20, flow rate = 0.8 mL/min,  $\lambda = 220$  nm;  $t_{\text{major}} = 4.94$  min,  $t_{\text{minor}} = 5.41$  min.



***tert*-Butyl (R)-2-(3-((benzyloxy)carbonyl)-2-phenylbut-3-en-1-yl)-3-nitro-1H-indole-1-carboxylate (3m).**

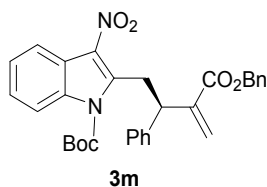

Yellow oil; Yield : 64%;  $[\alpha]_D^{30}$ :  $-56.5$  ( $c = 1.67$ ,  $\text{CH}_2\text{Cl}_2$ );  $^1\text{H}$  NMR (400 MHz,  $\text{CDCl}_3$ ):  $\delta$  8.18 – 8.11 (m, 1H), 8.04 – 7.99 (m, 1H), 7.41 – 7.34 (m, 2H), 7.28 – 7.23 (m, 3H), 7.17 – 7.12 (m, 3H), 7.12 – 7.07 (m, 2H), 7.06 – 7.01 (m, 2H), 6.46 (s, 1H), 5.90 (s, 1H), 4.97 (d,  $J = 12.5$  Hz, 1H), 4.91 (d,  $J = 12.5$  Hz, 1H), 4.44 – 4.33 (m, 2H), 4.26–4.21 (m, 1H), 1.65 (s, 9H);  $^{13}\text{C}$  NMR (100 MHz,  $\text{CDCl}_3$ ):  $\delta$  166.1, 149.1, 142.6, 142.1, 140.3, 135.6, 133.9, 132.0, 128.5, 128.0, 127.9, 127.7, 126.9, 125.9, 125.4, 125.0, 121.3, 120.6, 115.0, 86.9, 66.5, 46.0, 30.8, 27.9; HRMS (ESI): calcd for  $\text{C}_{31}\text{H}_{30}\text{N}_2\text{O}_6\text{Na}$   $[\text{M}+\text{Na}]^+$ : 549.1996; found: 549.1987; HPLC analysis:  $er = 82.5:17.5$  on an AD-H column: hexane/*i*-PrOH = 80:20, flow rate = 0.8 mL/min,  $\lambda = 220$  nm;  $t_{\text{major}} = 6.26$  min,  $t_{\text{minor}} = 8.24$  min.

***tert*-Butyl (R)-2-(3-cyano-2-phenylbut-3-en-1-yl)-3-nitro-1H-indole-1-carboxylate (3n).**

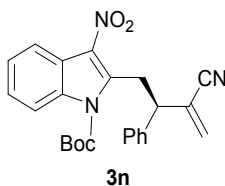

Yellow solid; Yield : 70%;  $[\alpha]_D^{30}$ : 0.60 ( $c = 1.00$ ,  $\text{CH}_2\text{Cl}_2$ ); mp: 122-123°C;  $^1\text{H}$  NMR (400 MHz,  $\text{CDCl}_3$ ):  $\delta$  8.24 – 8.15 (m, 1H), 8.01 – 7.91 (m, 1H), 7.44 – 7.33 (m, 2H), 7.29 – 7.21 (m, 3H), 7.17 (dd,  $J = 7.5, 1.9$  Hz, 2H), 5.95 (s, 1H), 5.81 (d,  $J = 1.2$  Hz, 1H), 4.44 – 4.28 (m, 2H), 4.04 (t,  $J = 7.7$  Hz, 1H), 1.71 (s, 9H);  $^{13}\text{C}$  NMR (100 MHz,  $\text{CDCl}_3$ ):  $\delta$  149.0, 141.6, 138.1, 133.8, 132.1, 130.8, 128.9, 128.0, 127.6, 126.2, 125.6, 125.2, 121.2, 120.7, 117.7, 115.1, 87.4, 49.8, 30.5, 28.0; HRMS (ESI): calcd for  $\text{C}_{24}\text{H}_{23}\text{N}_3\text{O}_4\text{Na}$   $[\text{M}]^+$ : 440.1581; found: 440.1581; HPLC analysis:  $er = 64:36$  on an IG column: hexane/*i*-PrOH = 80:20, flow rate = 0.8 mL/min,  $\lambda = 220$  nm;  $t_{\text{minor}} = 11.50$  min,  $t_{\text{major}} = 13.23$  min.

***tert*-Butyl (*R*)-5-fluoro-2-(3-(methoxycarbonyl)-2-phenylbut-3-en-1-yl)-3-nitro-1*H*-indole-1-carboxylate (**5a**).**

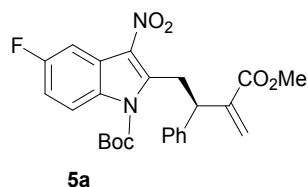

Yellow solid; Yield : 57%;  $[\alpha]_D^{30}$ : -84.9 ( $c = 1.00$ ,  $\text{CH}_2\text{Cl}_2$ ); mp: 129-130°C;  $^1\text{H}$  NMR (400 MHz,  $\text{CDCl}_3$ ):  $\delta$  8.00 (dd,  $J = 9.3, 4.5$  Hz, 1H), 7.83 (dd,  $J = 9.1, 2.6$  Hz, 1H), 7.17 – 7.05 (m, 6H), 6.39 (s, 1H), 5.85 (s, 1H), 4.40 – 4.32 (m, 2H), 4.24 – 4.21 (m, 1H), 3.51 (s, 3H), 1.68 (s, 9H);  $^{13}\text{C}$  NMR (100 MHz,  $\text{CDCl}_3$ ):  $\delta$  166.7, 160.4 (d,  $J = 243$  Hz), 148.81 (s), 144.1, 142.0, 140.2, 130.2, 128.4, 127.6, 127.0, 125.2, 122.3 (d,  $J = 11.4$  Hz), 116.4 (d,  $J = 9.1$  Hz), 114.0 (d,  $J = 25.3$  Hz), 106.47 (d,  $J = 26.9$  Hz), 87.3, 51.9, 45.9, 31.0, 27.9; HRMS (ESI): cacl'd for  $\text{C}_{25}\text{H}_{25}\text{N}_2\text{O}_6\text{NaF}$   $[\text{M}+\text{Na}]^+$ : 491.1589; found: 491.1579; HPLC analysis:  $er = 94:6$  on an AD-H column: hexane/*i*-PrOH = 80:20, flow rate = 0.5 mL/min,  $\lambda = 220$  nm;  $t_{\text{major}} = 8.49$  min,  $t_{\text{minor}} = 9.16$  min.

***tert*-Butyl (*R*)-5-chloro-2-(3-(methoxycarbonyl)-2-phenylbut-3-en-1-yl)-3-nitro-1*H*-indole-1-carboxylate (**5b**).**

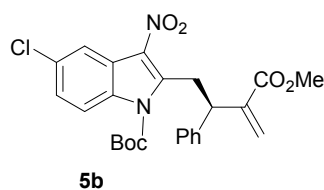

Yellow oil; Yield : 44%;  $[\alpha]_D^{30}$ : -71.6 ( $c = 1.00$ ,  $\text{CH}_2\text{Cl}_2$ );  $^1\text{H}$  NMR (400 MHz,  $\text{CDCl}_3$ ):  $\delta$  8.15 (d,  $J = 2.1$  Hz, 1H), 7.96 (d,  $J = 9.0$  Hz, 1H), 7.33 (dd,  $J = 9.0, 2.2$  Hz, 2H), 7.17 – 7.14 (m, 3H), 7.06 – 7.04 (m, 2H), 6.39 (s, 1H), 5.85 (s, 1H), 4.39 – 4.31 (m, 2H), 4.23 – 4.19 (m, 1H), 3.52 (s, 3H), 1.67 (s, 9H);  $^{13}\text{C}$  NMR (100 MHz,  $\text{CDCl}_3$ ):  $\delta$  166.6, 148.7, 143.8, 142.1, 140.2, 132.3, 131.2, 131.1, 128.4, 127.6, 127.1, 126.3, 125.2, 122.4, 120.2, 116.2, 87.5, 51.9, 45.9, 30.9, 27.9; HRMS (ESI): cacl'd for  $\text{C}_{25}\text{H}_{25}\text{N}_2\text{O}_6\text{NaCl}$   $[\text{M}+\text{Na}]^+$ : 507.1293; found: 507.1286; HPLC analysis:  $er = 97.5:2.5$  on an AD-H column: hexane/*i*-PrOH = 80:20, flow rate = 0.5 mL/min,  $\lambda = 220$  nm;  $t_{\text{major}} = 8.85$  min,  $t_{\text{minor}} = 9.31$  min.

***tert*-Butyl (*R*)-5-bromo-2-(3-(methoxycarbonyl)-2-phenylbut-3-en-1-yl)-3-nitro-1*H*-indole-1-carboxylate (**5c**).**

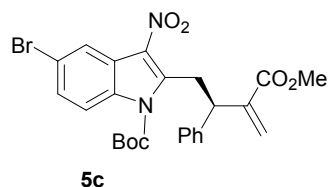

Yellow oil; Yield : 56%;  $[\alpha]_{\text{D}}^{30}$ :  $-71.7$  ( $c = 1.00$ ,  $\text{CH}_2\text{Cl}_2$ );  $^1\text{H}$  NMR (400 MHz,  $\text{CDCl}_3$ ):  $\delta$  8.30 (d,  $J = 2.0$  Hz, 1H), 7.90 (d,  $J = 9.0$  Hz, 1H), 7.46 (dd,  $J = 9.0$ , 2.1 Hz, 1H), 7.18 – 7.14 (m, 3H), 7.05 – 7.03 (m, 2H), 6.39 (s, 1H), 5.85 (s, 1H), 4.38 – 4.30 (m, 2H), 4.22 – 4.16 (m, 1H), 3.52 (s, 3H), 1.67 (s, 9H);  $^{13}\text{C}$  NMR (100 MHz,  $\text{CDCl}_3$ ):  $\delta$  166.6, 148.7, 143.7, 142.0, 140.1, 132.6, 131.0, 129.0, 128.4, 127.6, 127.0, 125.2, 123.1, 122.8, 118.7, 116.5, 87.5, 51.9, 45.9, 30.9, 27.9; HRMS (ESI): calcd for  $\text{C}_{25}\text{H}_{25}\text{N}_2\text{O}_6\text{Na}^{79}\text{Br}$   $[\text{M}+\text{Na}]^+$ : 551.0788; found: 551.0778; HPLC analysis:  $er = 96:4$  on an AS-H column: hexane/*i*-PrOH = 80:20, flow rate = 0.5 mL/min,  $\lambda = 220$  nm;  $t_{\text{minor}} = 9.93$  min,  $t_{\text{major}} = 10.96$  min.

***tert*-Butyl (*R*)-2-(3-(methoxycarbonyl)-2-phenylbut-3-en-1-yl)-5-methyl-3-nitro-1*H*-indole-1-carboxylate (**5d**).**

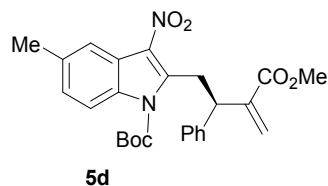

White solid; Yield : 47%;  $[\alpha]_{\text{D}}^{30}$ :  $-75.7$  ( $c = 1.00$ ,  $\text{CH}_2\text{Cl}_2$ ); mp: 53-54°C;  $^1\text{H}$  NMR (400 MHz,  $\text{CDCl}_3$ ):  $\delta$  8.77 (s, 1H), 8.09 (s, 1H), 7.17 – 7.14 (m, 3H), 7.05 – 7.03 (m, 2H), 6.41 (s, 1H), 5.87 (s, 1H), 4.44 – 4.37 (m, 2H), 4.27 – 4.23 (m, 1H), 3.54 (s, 3H), 2.70 (s, 3H), 1.71 (s, 9H);  $^{13}\text{C}$  NMR (100 MHz,  $\text{CDCl}_3$ ):  $\delta$  166.6, 148.2, 147.3, 147.0, 141.9, 140.0, 131.3, 131.0, 130.5, 128.5, 127.6, 127.2, 125.3, 124.4, 123.5, 112.9, 88.4, 52.0, 45.9, 31.1, 27.9, 20.9; HRMS (FAB): calcd for  $\text{C}_{26}\text{H}_{28}\text{N}_2\text{O}_6$   $[\text{M}]^+$ : 464.1947; found: 464.1947; HPLC analysis:  $er = 94:6$  on an AS-H column: hexane/*i*-PrOH = 80:20, flow rate = 0.5 mL/min,  $\lambda = 220$  nm;  $t_{\text{minor}} = 14.48$  min,  $t_{\text{major}} = 15.70$  min.

**Methyl (*R*)-3-(4-bromophenyl)-2-methylene-4-(3-nitro-1*H*-indol-2-yl)butanoate (**6**)**

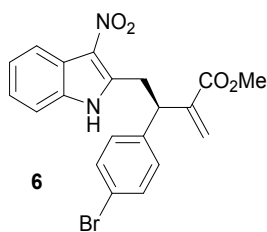

To a solution of **3d** (53 mg, 0.1 mmol) in anhydrous CH<sub>2</sub>Cl<sub>2</sub> (1.5 mL) was added TFA (0.10 mL) at room temperature overnight. After completion of the reaction, the reaction solution was neutralized with saturated NaHCO<sub>3(aq)</sub> and extracted with CH<sub>2</sub>Cl<sub>2</sub>. The organic layer was dried over Na<sub>2</sub>SO<sub>4</sub> and concentrated. The crude was purified by silica gel flash chromatography (Hexanes/EA 5:1 to 2:1) to afford the pure product **6** (36 mg).

Yellow solid; Yield : 84%; [α]<sub>D</sub><sup>30</sup>: -116.4 (*c* = 1.20, CH<sub>2</sub>Cl<sub>2</sub>); mp: 53-54°C; <sup>1</sup>H NMR (400 MHz, CDCl<sub>3</sub>): δ 9.51 (s, 1H), 8.26 (d, *J* = 7.9 Hz, 1H), 7.42 – 7.21 (m, 5H), 7.11 (d, *J* = 8.4 Hz, 2H), 6.31 (s, 1H), 5.80 (s, 1H), 4.52 (t, *J* = 7.9 Hz, 1H), 3.97 (dd, *J* = 14.3, 7.7 Hz, 1H), 3.73 (dd, *J* = 14.3, 8.1 Hz, 1H), 3.66 (s, 3H); <sup>13</sup>C NMR (100 MHz, CDCl<sub>3</sub>): δ 167.4, 142.7, 141.3, 139.8, 132.8, 131.8, 129.3, 126.8, 126.4, 124.6, 124.0, 121.4, 121.1, 120.7, 111.7, 52.3, 45.1, 32.9; HRMS (ESI): caclcd for C<sub>20</sub>H<sub>17</sub>N<sub>2</sub>O<sub>4</sub><sup>79</sup>BrNa[M+Na]<sup>+</sup>: 451.0263; found: 451.0266; HPLC analysis: *er* = 96:4 on an AD-H column: hexane/*i*-PrOH = 80:20, flow rate = 0.5 mL/min, λ = 220 nm; *t*<sub>major</sub> = 15.91 min, *t*<sub>minor</sub> = 16.85 min.

#### 4. Computational methods

All Kohn-Sham DFT calculations were performed by Gaussian09 suite of ab initio

program<sup>3</sup>. All geometries were fully optimized by using a hybrid functional B3LYP<sup>4-5</sup> and 6-31g(d) basis set and applied for harmonic vibrational frequency calculations to confirm the minima under 298 K. In the conformation analysis, the species in *R* and *S* form with lowest energy were selected for further study. TD-DFT calculations were carried out to obtain the electronic circular dichroism (ECD) spectra. Two functional/basis sets CAM-B3LYP<sup>4</sup>/TZVP<sup>7,8</sup> and wB97XD<sup>9</sup>/6-311+g(d,p) were applied in the calculations for comparison. Computational solvent effect has been carried out with the polarizable conductor calculation model (CPCM)<sup>10-11</sup> for MeCN ( $\epsilon = 37.5$ ). The ECD data were analyzed by the program SpecDis.<sup>12</sup> The  $\sigma$ -value of 0.4 eV was applied for spectrometric correction.

**Table S1.** Relative energies for compound **3a** and **3d**.

| <b>3a</b>           |                                                            | <b>3d</b>           |                                                            |
|---------------------|------------------------------------------------------------|---------------------|------------------------------------------------------------|
| <b>Conformation</b> | <b><math>\Delta\Delta G</math> (kcal mol<sup>-1</sup>)</b> | <b>Conformation</b> | <b><math>\Delta\Delta G</math> (kcal mol<sup>-1</sup>)</b> |
| <i>R1</i>           | 0                                                          | <i>R1</i>           | 0                                                          |
| <i>R2</i>           | 2.43                                                       | <i>R2</i>           | 2.23                                                       |
| <i>R3</i>           | 3.02                                                       | <i>R3</i>           | 2.89                                                       |
| <i>R4</i>           | 1.96                                                       | <i>R4</i>           | 0.89                                                       |
| <i>R5</i>           | 0.54                                                       | <i>R5</i>           | 0.15                                                       |
| <i>R6</i>           | 1.79                                                       | <i>R6</i>           | 1.31                                                       |
| <i>R7</i>           | 3.60                                                       | <i>R7</i>           | 3.56                                                       |
| <i>R8</i>           | 4.05                                                       | <i>R8</i>           | 4.36                                                       |
| <b>Conformation</b> | <b><math>\Delta\Delta G</math> (kcal mol<sup>-1</sup>)</b> | <b>Conformation</b> | <b><math>\Delta\Delta G</math> (kcal mol<sup>-1</sup>)</b> |
| <i>S1</i>           | 0                                                          | <i>S1</i>           | 0                                                          |
| <i>S2</i>           | 3.70                                                       | <i>S2</i>           | 3.38                                                       |
| <i>S3</i>           | 1.78                                                       | <i>S3</i>           | 1.96                                                       |
| <i>S4</i>           | 4.27                                                       | <i>S4</i>           | 3.89                                                       |
| <i>S5</i>           | 1.79                                                       | <i>S5</i>           | 1.81                                                       |
| <i>S6</i>           | 3.88                                                       | <i>S6</i>           | 4.05                                                       |
| <i>S7</i>           | 2.79                                                       | <i>S7</i>           | 3.46                                                       |
| <i>S8</i>           | 2.92                                                       | <i>S8</i>           | 3.10                                                       |

(A)

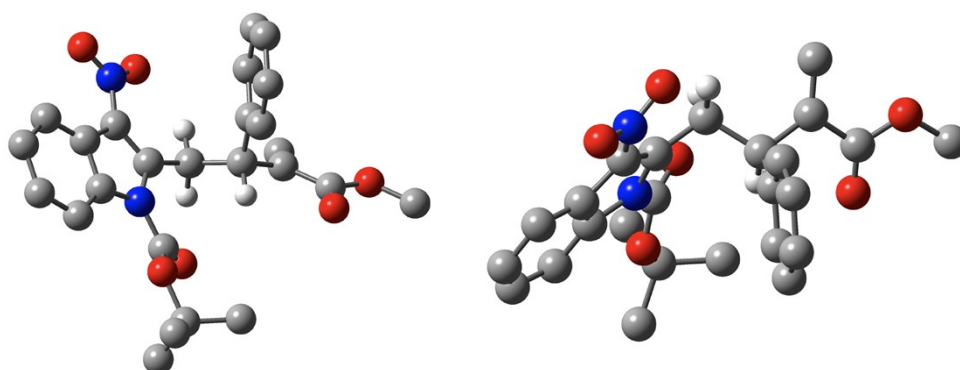

(B)

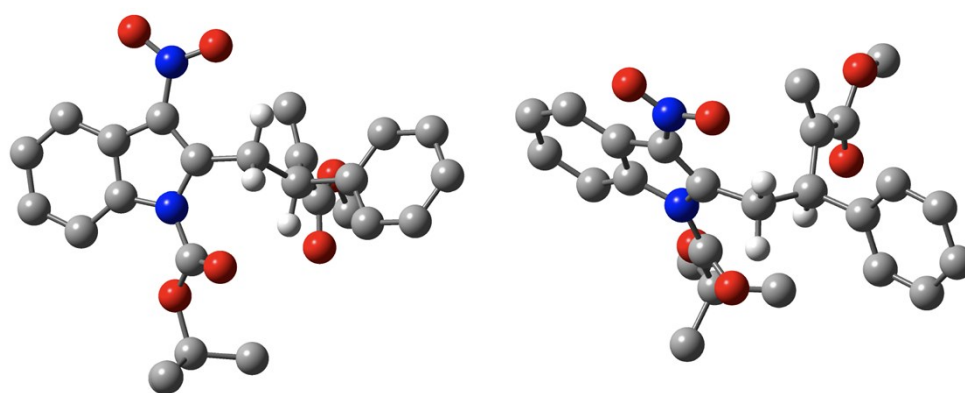

**Figure S1.** Two views of DFT-optimized geometries of (A) **3a-R1** and (B) **3a-S1**. Some hydrogen atoms are omitted for clarity.

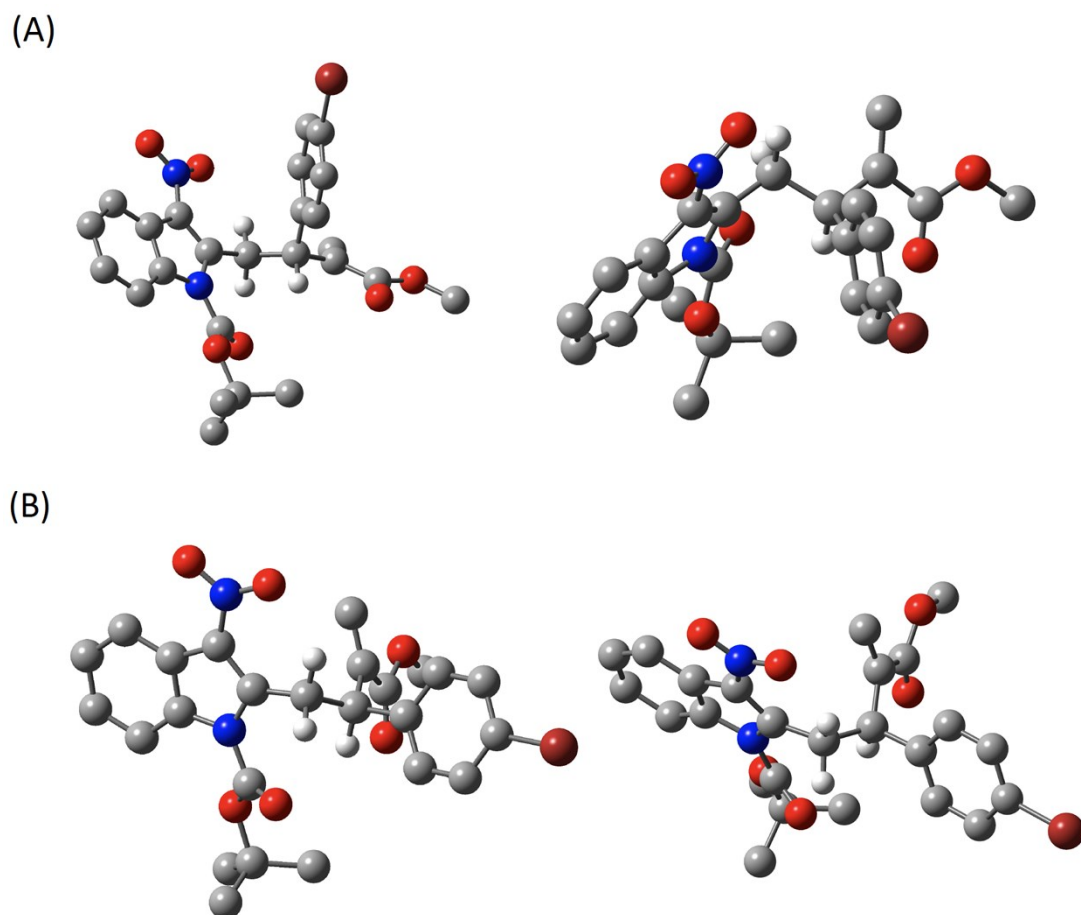

**Figure S2.** Two views of DFT-optimized geometries of (A) **3d-R1** and (B) **3d-S1**. Some hydrogen atoms are omitted for clarity.

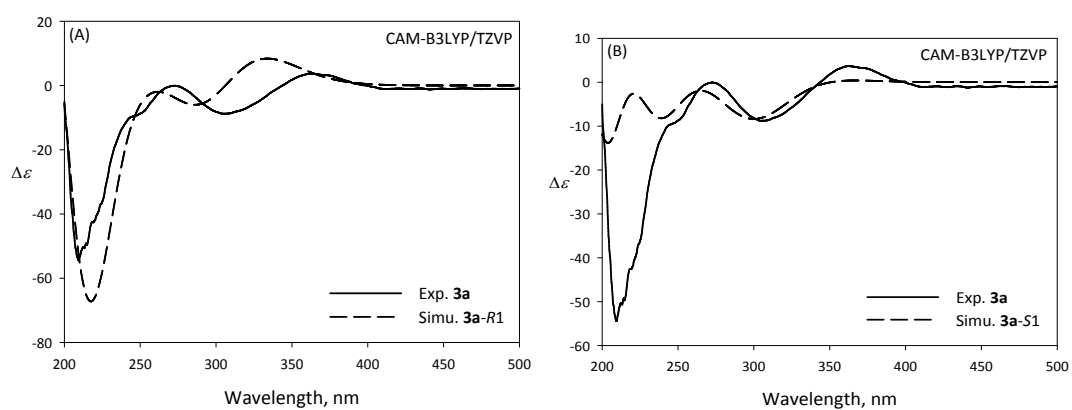

**Figure S3.** Experimental and calculated ECD spectra of (A) **3a-R1** and (B) **3a-S1** at CAM-B3LYP/TZVP level.

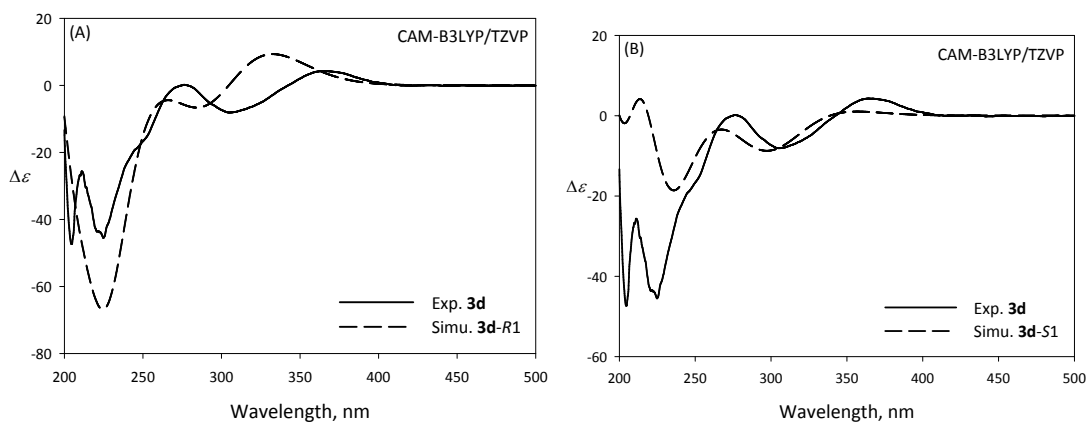

**Figure S4.** Experimental and calculated ECD spectra of (A) **3d-R1** and (B) **3d-S1** at CAM-B3LYP/TZVP level.

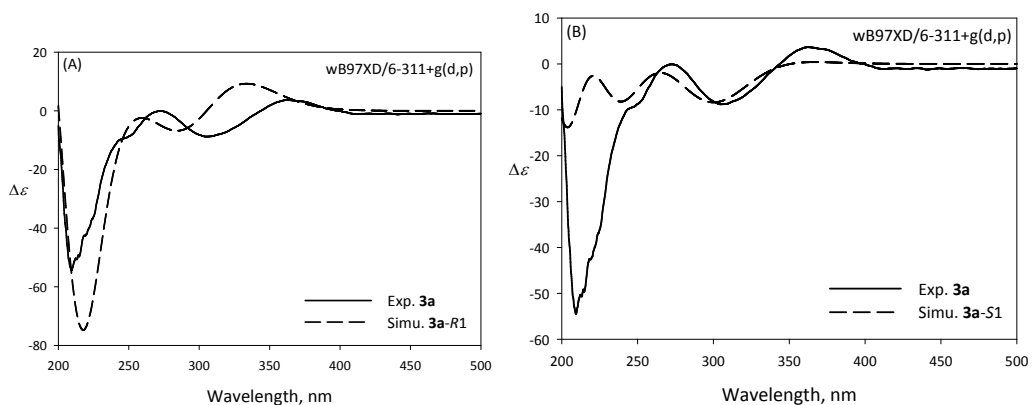

**Figure S5.** Experimental and calculated ECD spectra of (A) **3a-R1** and (B) **3a-S1** at wB97XD/6-311+g(d,p) level.

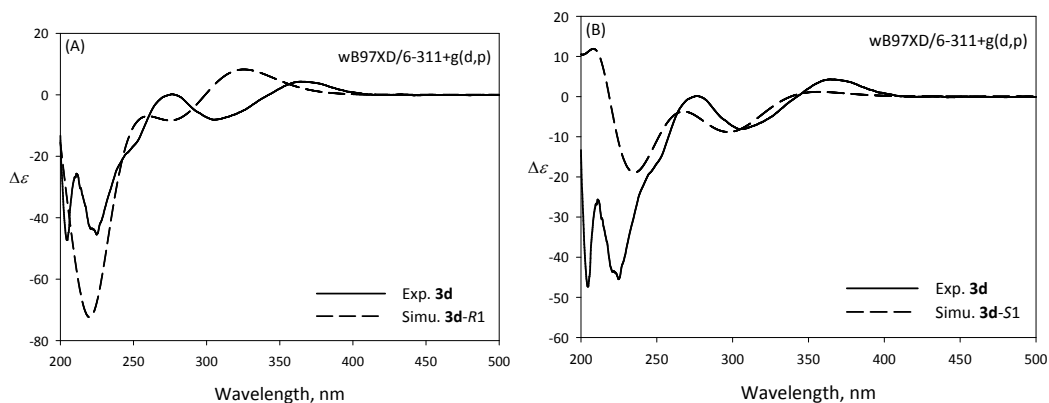

**Figure S6.** Experimental and calculated ECD spectra of (A) **3d-R1** and (B) **3d-S1** at wB97XD/6-311+g(d,p) level.



## 5. References

1. X.-F. Ding, W.-L. Yang, J. Mao, C.-X. Cao and W.-P. Deng, *Org. Lett.*, 2019, **21**, 5514–5518.
2. S. Kayal and S. Mukherjee, *Org. Lett.*, 2017, **19**, 4944–4947.
3. Gaussian 09, Revision D.01, M. J. Frisch, G. W. Trucks, H. B. Schlegel, G. E. Scuseria, M. A. Robb, J. R. Cheeseman, G. Scalmani, V. Barone, B. Mennucci, G. A. Petersson, H. Nakatsuji, M. Caricato, X. Li, H. P. Hratchian, A. F. Izmaylov, J. Bloino, G. Zheng, J. L. Sonnenberg, M. Hada, M. Ehara, K. Toyota, R. Fukuda, J. Hasegawa, M. Ishida, T. Nakajima, Y. Honda, O. Kitao, H. Nakai, T. Vreven, J. J. A. Montgomery, J. E. Peralta, F. Ogliaro, M. Bearpark, J. J. Heyd, E. Brothers, K. N. Kudin, V. N. Staroverov, R. Kobayashi, J. Normand, K. Raghavachari, A. Rendell, J. C. Burant, S. S. Iyengar, J. Tomasi, M. Cossi, N. Rega, J. M. Millam, M. Klene, J. E. Knox, J. B. Cross, V. Bakken, C. Adamo, J. Jaramillo, R. Gomperts, R. E. Stratmann, O. Yazyev, A. J. Austin, R. Cammi, C. Pomelli, J. W. Ochterski, R. L. Martin, K. Morokuma, V. G. Zakrzewski, G. A. Voth, P. Salvador, J. J. Dannenberg, S. Dapprich, A. D. Daniels, Ö. Farkas, J. B. Foresman, J. V. Ortiz, J. Cioslowski, D. J. Fox, Gaussian, Inc. Wallingford, CT, 2009.
4. C.-T. Lee, W.-T. Yang and R. G. Parr, *Phys. Rev. B*, **1988**, *37*, 785-789.
5. A. D. Becke, *J. Chem. Phys.*, **1993**, *98*, 5648-5652.
6. T. Yanai, D. Tew and N. Handy, *Chem. Phys. Lett.*, **2004**, *393*, 51-57.
7. A. Schaefer, H. Horn and R. Ahlrichs, *J. Chem. Phys.*, **1992**, *97*, 2571-2577.
8. A. Schaefer, C. Huber and R. Ahlrichs, *J. Chem. Phys.*, **1994**, *100*, 5829-5835.
9. J.-D. Chai and M. Head-Gordon, *Phys. Chem. Chem. Phys.*, **2008**, *10*, 6615-6620.
10. V. Barone and M. Cossi, *J. Phys. Chem. A*, **1998**, *102*, 1995-2001.
11. M. Cossi, N. Rega, G. Scalmani and V. Barone, *J. Comput. Chem.*, **2003**, *24*, 669-681.
12. T. Bruhn, A. Schaumlöffel, Y. Hemberger, SpecDis version 1.63, University of Wuerzburg, Germany, **2015**.

## 6. Copies of HPLC Spectra of Racemic and Chiral Products

### Rac-3a

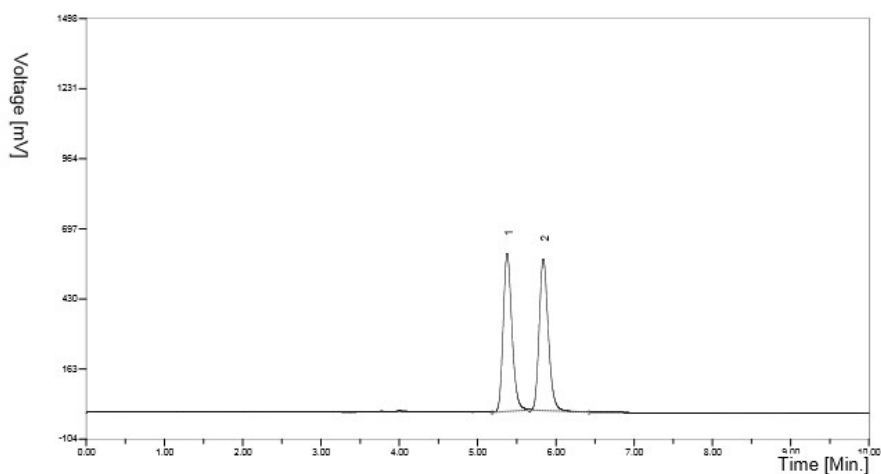

#### Integration Result

| #     | Ret. Time(min) | Area(mv.sec) | Area Percentage(%) |
|-------|----------------|--------------|--------------------|
| 1     | 5.38           | 4658.94      | 49.9524            |
| 2     | 5.84           | 4667.82      | 50.0476            |
| Total |                | 9326.76      | 100                |

### 3a

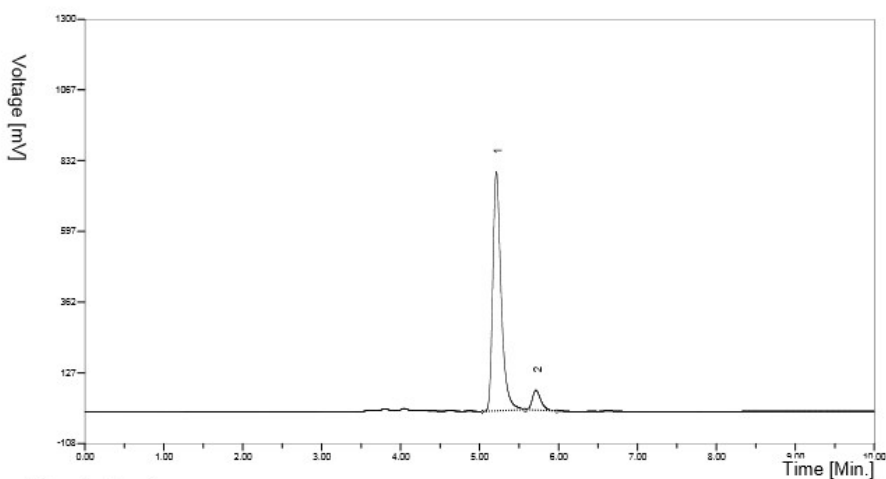

#### Integration Result

| #     | Ret. Time(min) | Peak Height(mv) | Area(mv.sec) | Area Percentage(%) |
|-------|----------------|-----------------|--------------|--------------------|
| 1     | 5.21           | 793.56          | 5829.04      | 92.1667            |
| 2     | 5.71           | 65.96           | 495.41       | 7.8333             |
| Total |                | 859.52          | 6324.45      | 100                |

### Rac-3b

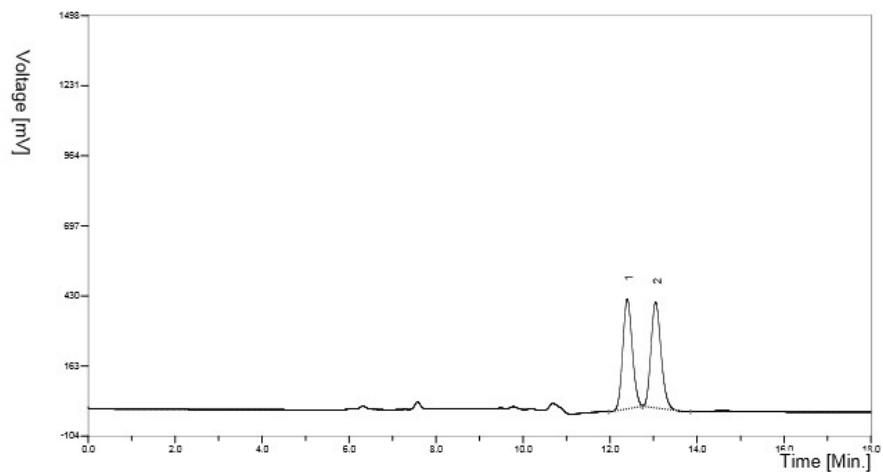

**Integration Result**

| #     | Ret. Time(min) | Area(mv.sec) | Area Percentage(%) |
|-------|----------------|--------------|--------------------|
| 1     | 12.40          | 6322.45      | 49.7191            |
| 2     | 13.05          | 6393.89      | 50.2809            |
| Total |                | 12716.34     | 100                |

**3b**

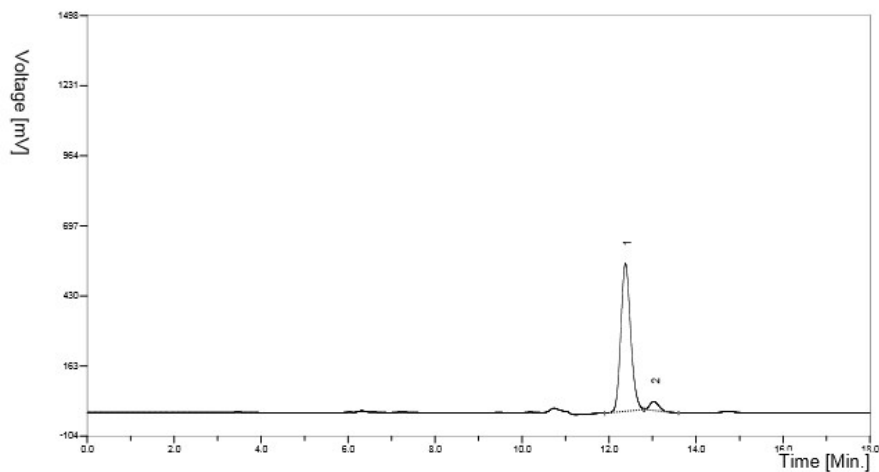

**Integration Result**

| #     | Ret. Time(min) | Area(mv.sec) | Area Percentage(%) |
|-------|----------------|--------------|--------------------|
| 1     | 12.38          | 8795.27      | 95.3046            |
| 2     | 13.03          | 433.32       | 4.6954             |
| Total |                | 9228.58      | 100                |

**Rac-3c**

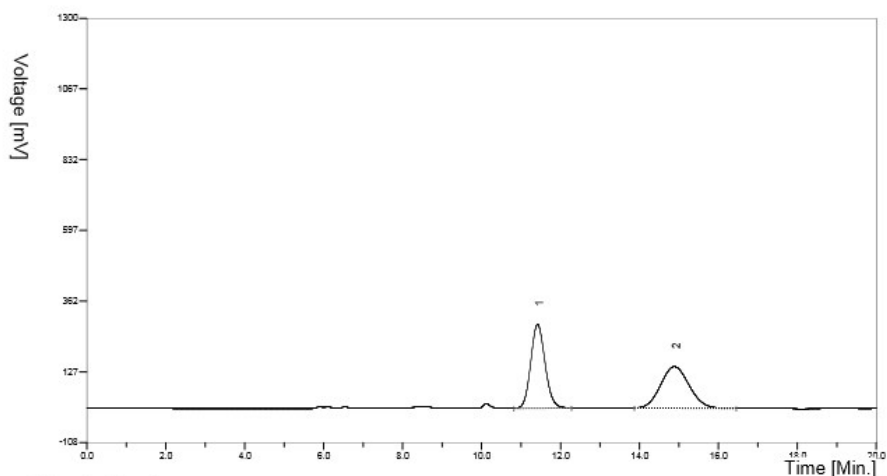

**Integration Result**

| #     | Ret. Time(min) | Peak Height(mv) | Area(mv.sec) | Area Percentage(%) |
|-------|----------------|-----------------|--------------|--------------------|
| 1     | 11.42          | 278.65          | 7017.56      | 50.3905            |
| 2     | 14.88          | 137.77          | 6908.80      | 49.6095            |
| Total |                | 416.42          | 13926.37     | 100                |

**3c**

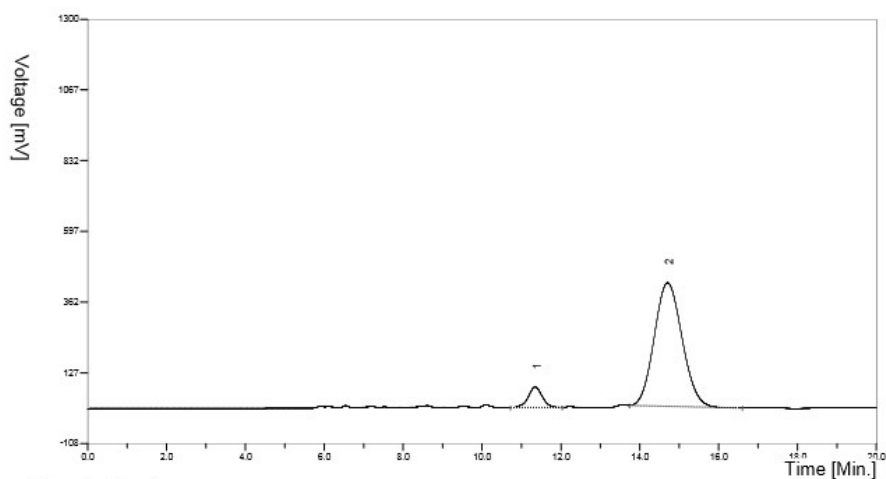

**Integration Result**

| #     | Ret. Time(min) | Peak Height(mv) | Area(mv.sec) | Area Percentage(%) |
|-------|----------------|-----------------|--------------|--------------------|
| 1     | 11.35          | 68.01           | 1704.13      | 7.8228             |
| 2     | 14.70          | 410.21          | 20080.09     | 92.1772            |
| Total |                | 478.23          | 21784.21     | 100                |

**Rac-3d**

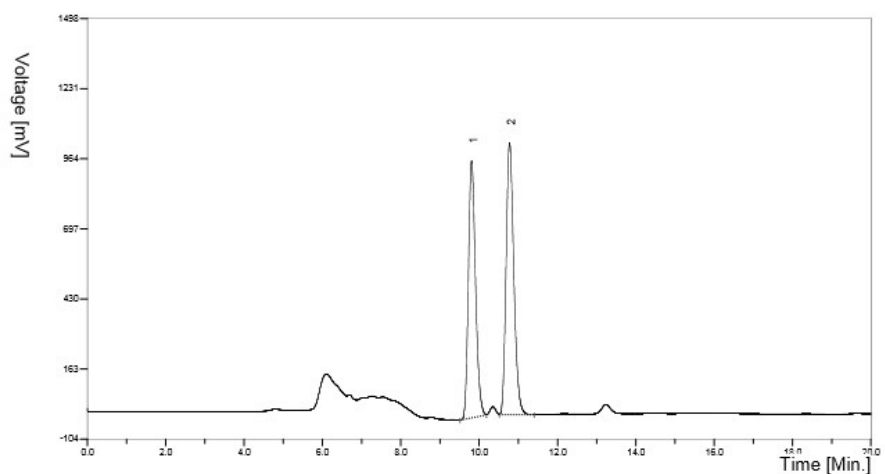

**Integration Result**

| #     | Ret. Time(min) | Area(mv.sec) | Area Percentage(%) |
|-------|----------------|--------------|--------------------|
| 1     | 9.81           | 12315.48     | 46.5684            |
| 2     | 10.78          | 14130.50     | 53.4316            |
| Total |                | 26445.99     | 100                |

**3d**

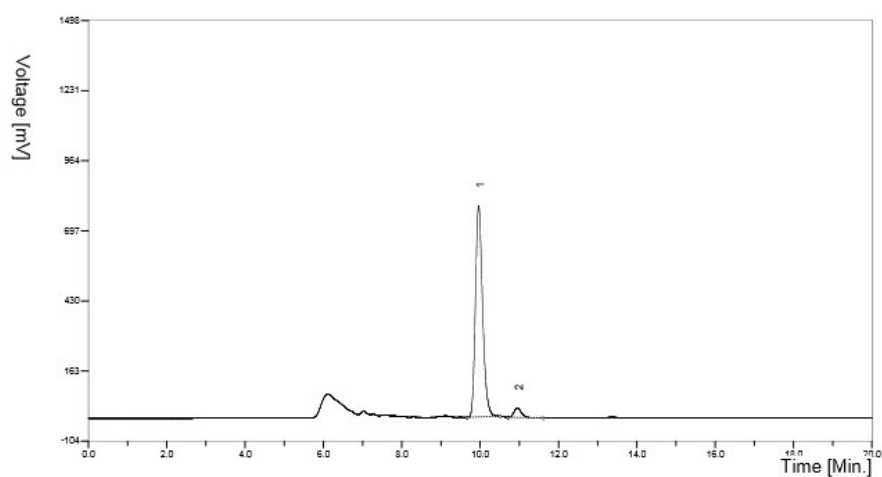

**Integration Result**

| #     | Ret. Time(min) | Area(mv.sec) | Area Percentage(%) |
|-------|----------------|--------------|--------------------|
| 1     | 9.96           | 10204.27     | 95.5303            |
| 2     | 10.95          | 477.44       | 4.4697             |
| Total |                | 10681.71     | 100                |

**Rac-3e**

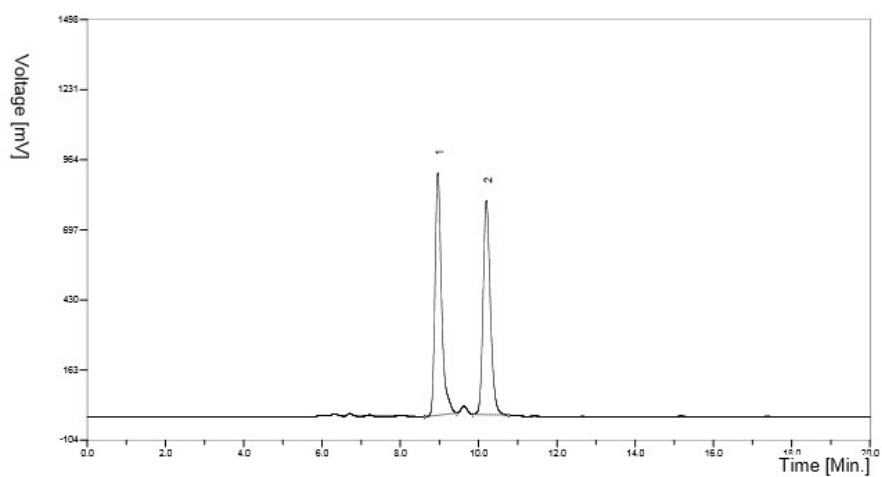

**Integration Result**

| #     | Ret. Time(min) | Area(mv.sec) | Area Percentage(%) |
|-------|----------------|--------------|--------------------|
| 1     | 8.96           | 10775.37     | 50.6565            |
| 2     | 10.20          | 10496.05     | 49.3435            |
| Total |                | 21271.42     | 100                |

**3e**

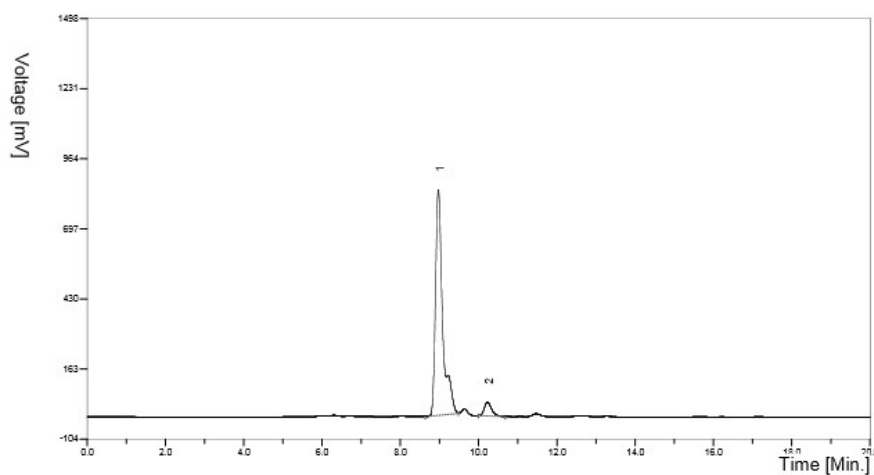

**Integration Result**

| #     | Ret. Time(min) | Area(mv.sec) | Area Percentage(%) |
|-------|----------------|--------------|--------------------|
| 1     | 8.97           | 10942.83     | 94.1322            |
| 2     | 10.23          | 682.14       | 5.8678             |
| Total |                | 11624.97     | 100                |

**Rac-3f**

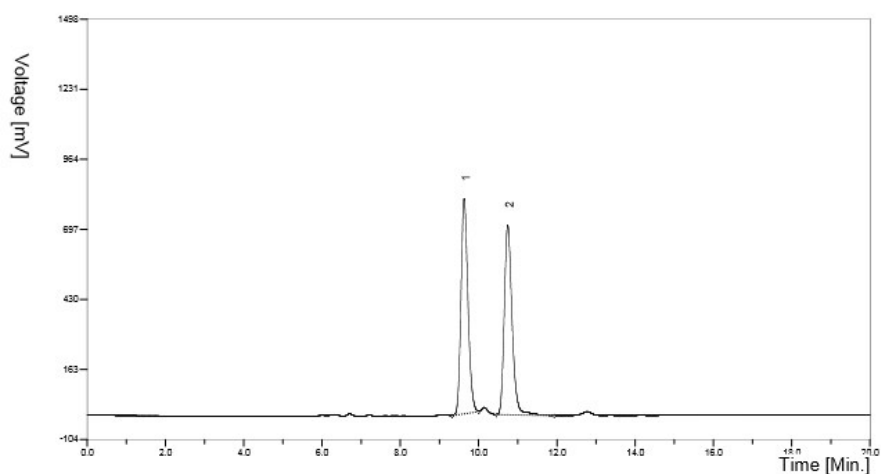

**Integration Result**

| #     | Ret. Time(min) | Area(mv.sec) | Area Percentage(%) |
|-------|----------------|--------------|--------------------|
| 1     | 9.63           | 10090.53     | 50.1342            |
| 2     | 10.75          | 10036.51     | 49.8658            |
| Total |                | 20127.04     | 100                |

**3f**

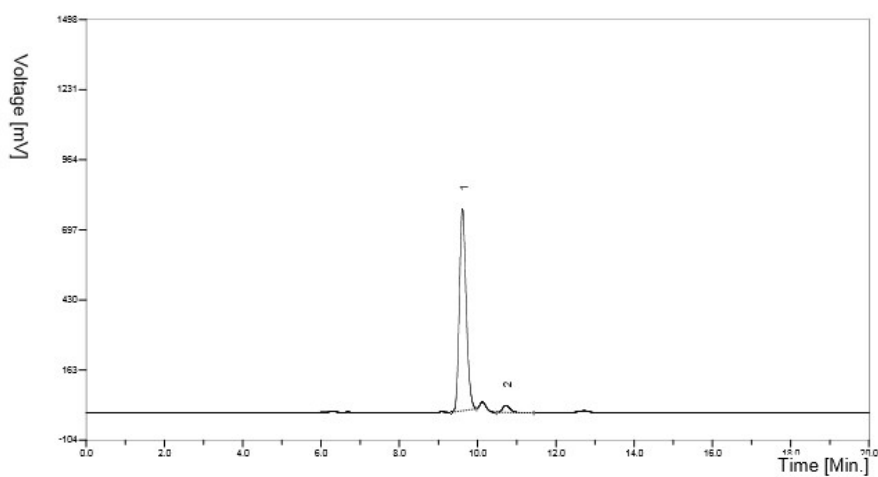

**Integration Result**

| #     | Ret. Time(min) | Area(mv.sec) | Area Percentage(%) |
|-------|----------------|--------------|--------------------|
| 1     | 9.61           | 9286.83      | 96.1525            |
| 2     | 10.72          | 371.61       | 3.8475             |
| Total |                | 9658.44      | 100                |

**Rac-3g**

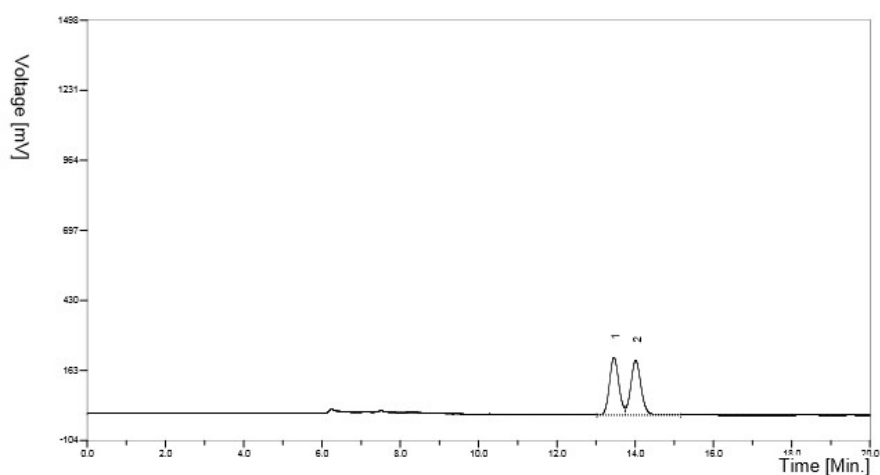

**Integration Result**

| #     | Ret. Time(min) | Area(mv.sec) | Area Percentage(%) |
|-------|----------------|--------------|--------------------|
| 1     | 13.46          | 3652.37      | 49.1994            |
| 2     | 14.01          | 3771.23      | 50.8006            |
| Total |                | 7423.60      | 100                |

**3g**

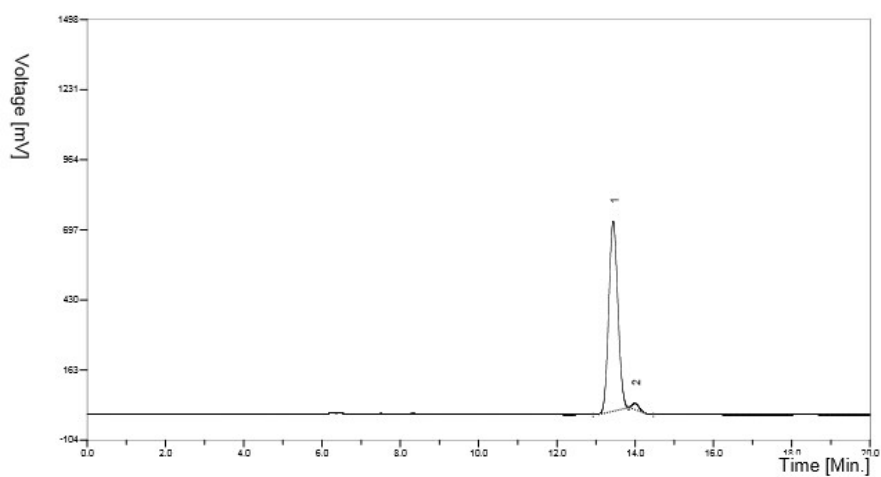

**Integration Result**

| #     | Ret. Time(min) | Area(mv.sec) | Area Percentage(%) |
|-------|----------------|--------------|--------------------|
| 1     | 13.44          | 11581.87     | 98.1907            |
| 2     | 13.99          | 213.42       | 1.8093             |
| Total |                | 11795.29     | 100                |

**Rac-3h**



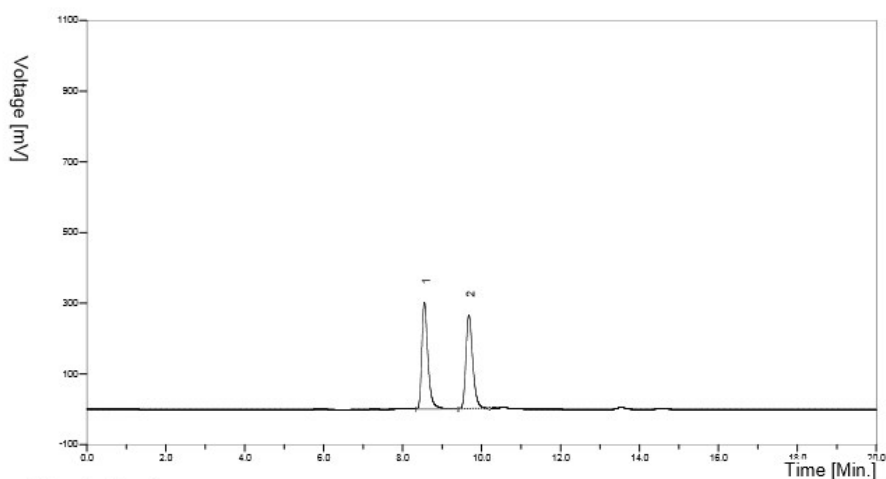

**Integration Result**

| #     | Ret. Time(min) | Area(mv.sec) | Area Percentage(%) |
|-------|----------------|--------------|--------------------|
| 1     | 8.55           | 3205.79      | 50.4750            |
| 2     | 9.68           | 3145.45      | 49.5250            |
| Total |                | 6351.24      | 100                |

**3h**

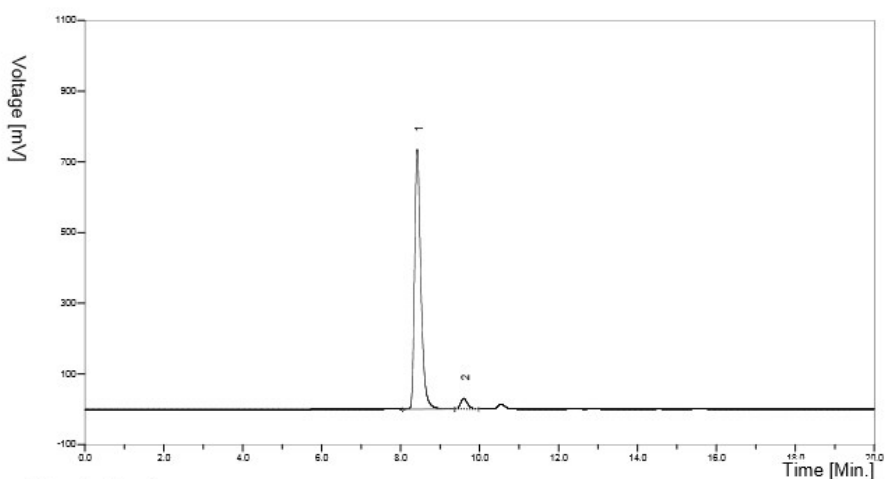

**Integration Result**

| #     | Ret. Time(min) | Area(mv.sec) | Area Percentage(%) |
|-------|----------------|--------------|--------------------|
| 1     | 8.42           | 8123.05      | 95.8118            |
| 2     | 9.60           | 355.08       | 4.1882             |
| Total |                | 8478.13      | 100                |

**Rac-3i**

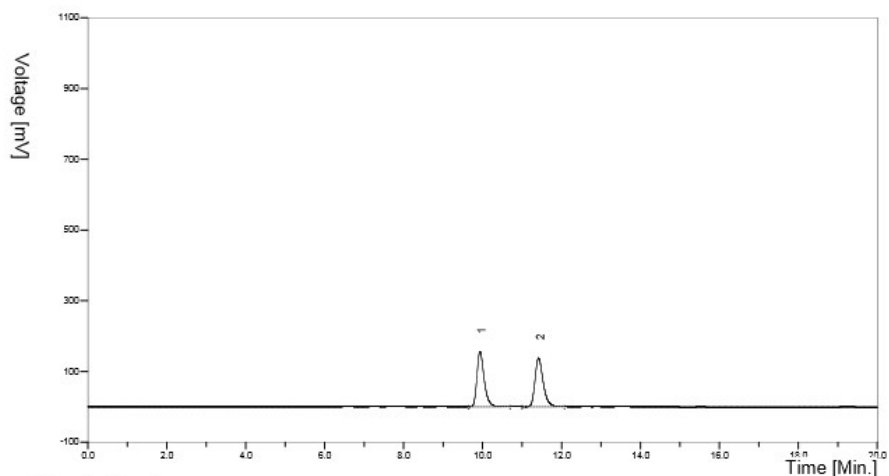

**Integration Result**

| #     | Ret. Time(min) | Area(mv.sec) | Area Percentage(%) |
|-------|----------------|--------------|--------------------|
| 1     | 9.94           | 1993.02      | 50.1726            |
| 2     | 11.42          | 1979.31      | 49.8274            |
| Total |                | 3972.33      | 100                |

**3i**

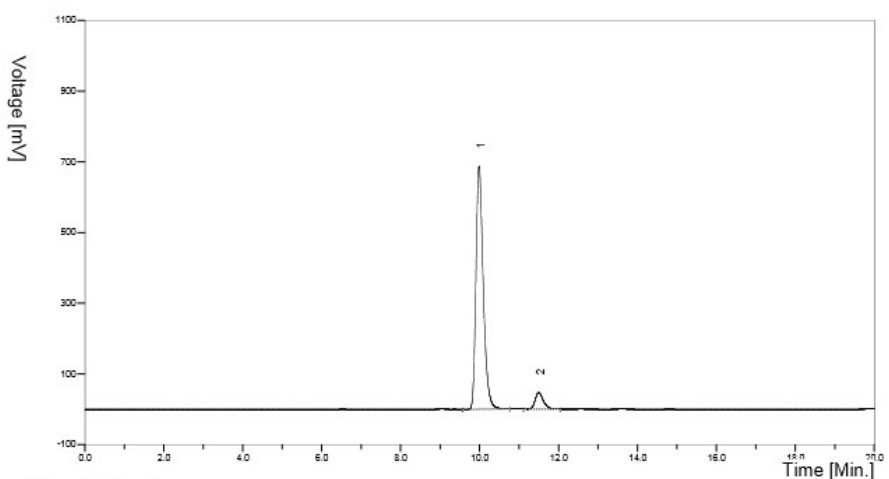

**Integration Result**

| #     | Ret. Time(min) | Area(mv.sec) | Area Percentage(%) |
|-------|----------------|--------------|--------------------|
| 1     | 9.99           | 8821.70      | 92.9306            |
| 2     | 11.50          | 671.09       | 7.0694             |
| Total |                | 9492.79      | 100                |

**Rac-3j**

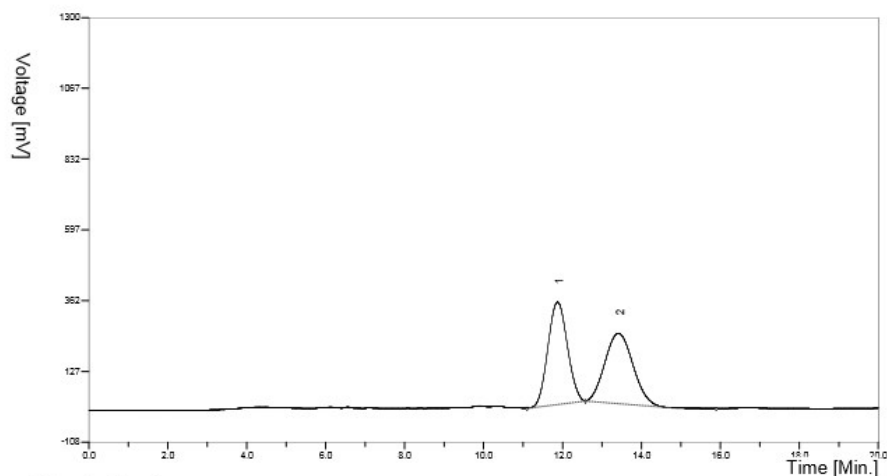

**Integration Result**

| #     | Ret. Time(min) | Peak Height(mv) | Area(mv.sec) | Area Percentage(%) |
|-------|----------------|-----------------|--------------|--------------------|
| 1     | 11.87          | 339.78          | 11648.79     | 51.6393            |
| 2     | 13.42          | 231.17          | 10909.23     | 48.3607            |
| Total |                | 570.95          | 22558.02     | 100                |

3j

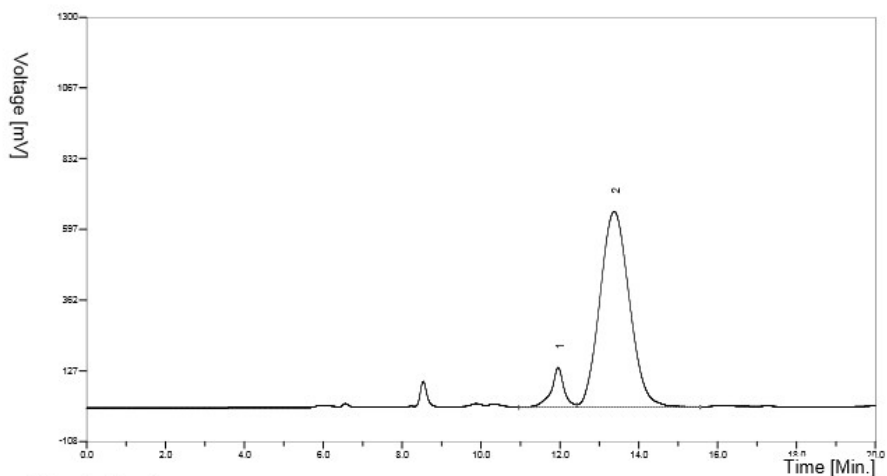

**Integration Result**

| #     | Ret. Time(min) | Peak Height(mv) | Area(mv.sec) | Area Percentage(%) |
|-------|----------------|-----------------|--------------|--------------------|
| 1     | 11.96          | 131.75          | 2953.79      | 8.0586             |
| 2     | 13.38          | 649.52          | 33700.08     | 91.9414            |
| Total |                | 781.27          | 36653.87     | 100                |

*Rac-3k*

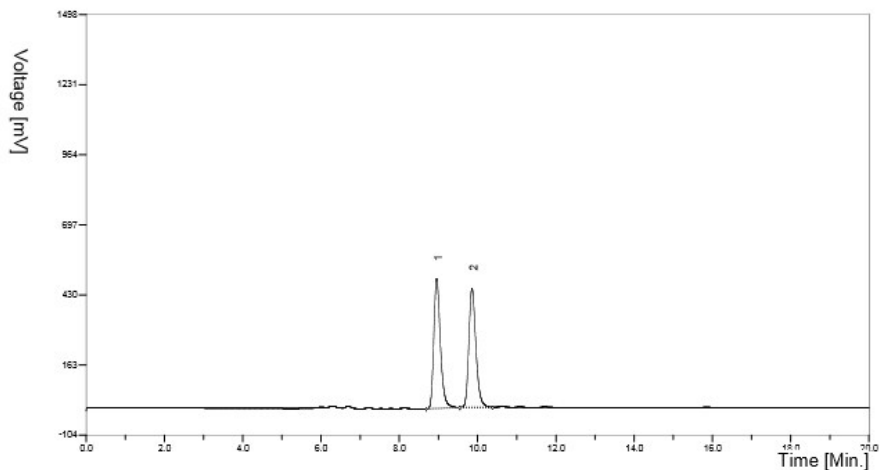

**Integration Result**

| #     | Ret. Time(min) | Area(mv.sec) | Area Percentage(%) |
|-------|----------------|--------------|--------------------|
| 1     | 8.95           | 5791.37      | 50.5738            |
| 2     | 9.86           | 5659.94      | 49.4262            |
| Total |                | 11451.31     | 100                |

**3k**

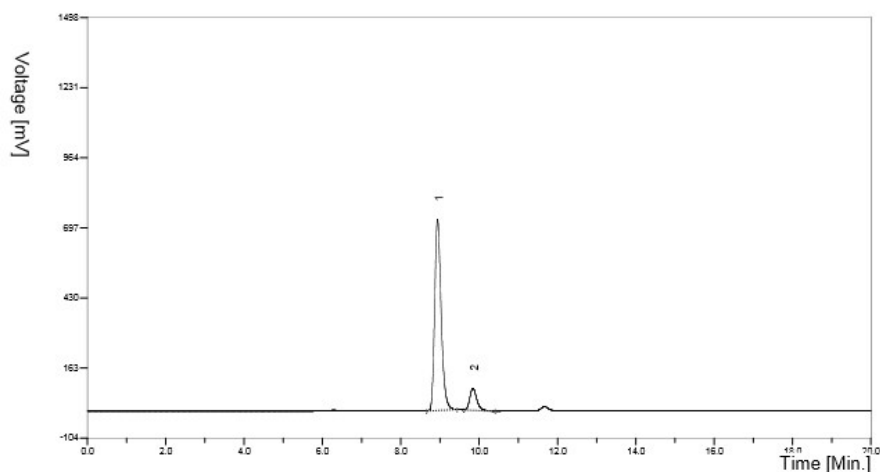

**Integration Result**

| #     | Ret. Time(min) | Area(mv.sec) | Area Percentage(%) |
|-------|----------------|--------------|--------------------|
| 1     | 8.94           | 8360.85      | 88.9481            |
| 2     | 9.84           | 1038.85      | 11.0519            |
| Total |                | 9399.70      | 100                |

**Rac-3l**

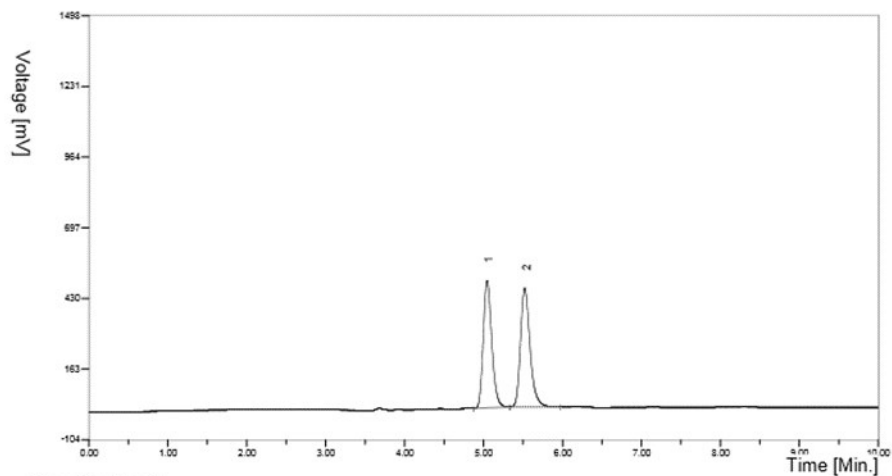

**Integration Result**

| #     | Ret. Time(min) | Area(mv.sec) | Area Percentage(%) |
|-------|----------------|--------------|--------------------|
| 1     | 5.05           | 3619.89      | 49.0979            |
| 2     | 5.52           | 3752.91      | 50.9021            |
| Total |                | 7372.79      | 100                |

31

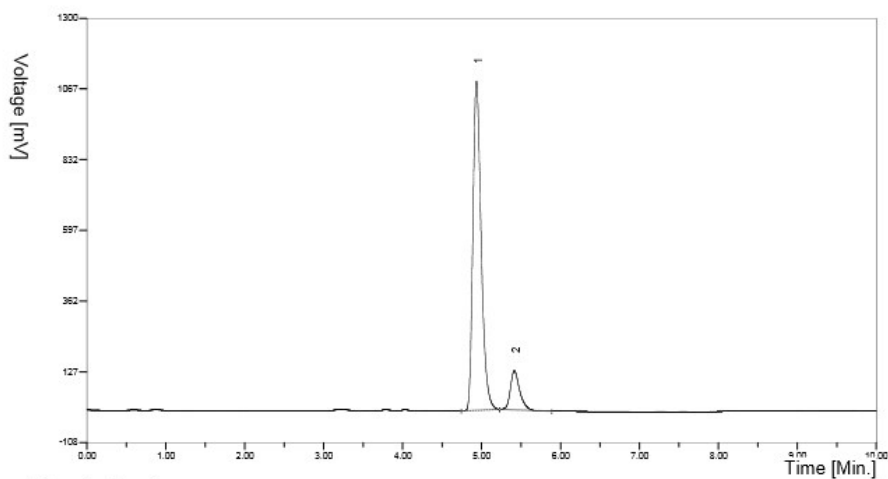

**Integration Result**

| #     | Ret. Time(min) | Peak Height(mv) | Area(mv.sec) | Area Percentage(%) |
|-------|----------------|-----------------|--------------|--------------------|
| 1     | 4.94           | 1091.30         | 7941.54      | 88.1970            |
| 2     | 5.42           | 129.68          | 1062.78      | 11.8030            |
| Total |                | 1220.98         | 9004.32      | 100                |

*Rac-3m*

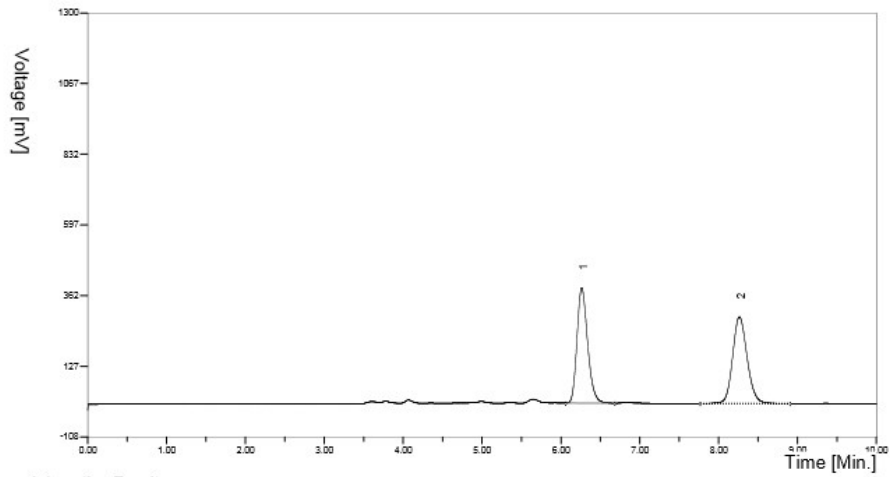

**Integration Result**

| #     | Ret. Time(min) | Peak Height(mv) | Area(mv.sec) | Area Percentage(%) |
|-------|----------------|-----------------|--------------|--------------------|
| 1     | 6.26           | 382.44          | 3596.07      | 49.3979            |
| 2     | 8.26           | 288.32          | 3683.73      | 50.6021            |
| Total |                | 670.75          | 7279.79      | 100                |

**3m**

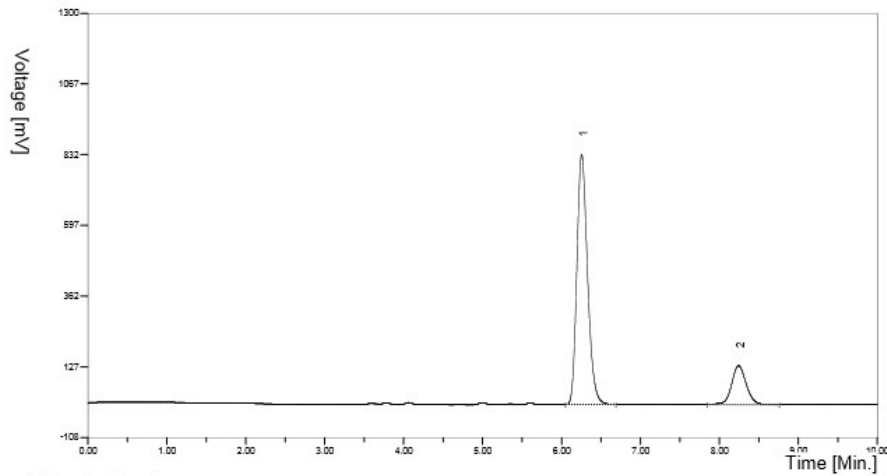

**Integration Result**

| #     | Ret. Time(min) | Peak Height(mv) | Area(mv.sec) | Area Percentage(%) |
|-------|----------------|-----------------|--------------|--------------------|
| 1     | 6.26           | 829.73          | 7784.59      | 82.4872            |
| 2     | 8.24           | 129.15          | 1652.75      | 17.5128            |
| Total |                | 958.88          | 9437.34      | 100                |

### Rac-3n

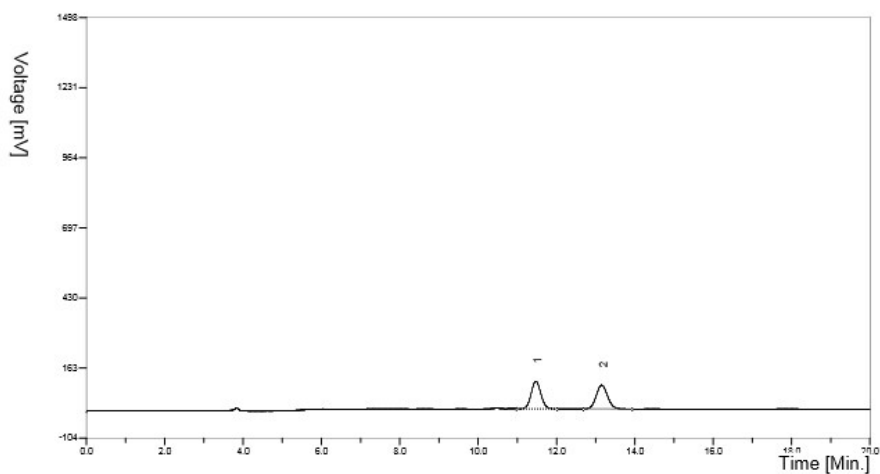

#### Integration Result

| #     | Ret. Time(min) | Area(mv.sec) | Area Percentage(%) |
|-------|----------------|--------------|--------------------|
| 1     | 11.47          | 1801.51      | 49.7436            |
| 2     | 13.15          | 1820.08      | 50.2564            |
| Total |                | 3621.58      | 100                |

### 3n

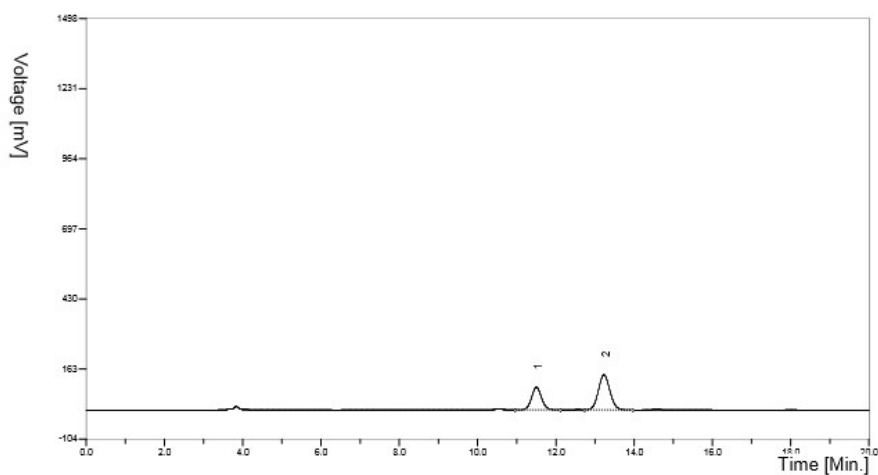

#### Integration Result

| #     | Ret. Time(min) | Area(mv.sec) | Area Percentage(%) |
|-------|----------------|--------------|--------------------|
| 1     | 11.50          | 1510.71      | 35.6788            |
| 2     | 13.23          | 2723.49      | 64.3212            |
| Total |                | 4234.20      | 100                |

**Rac-5a**

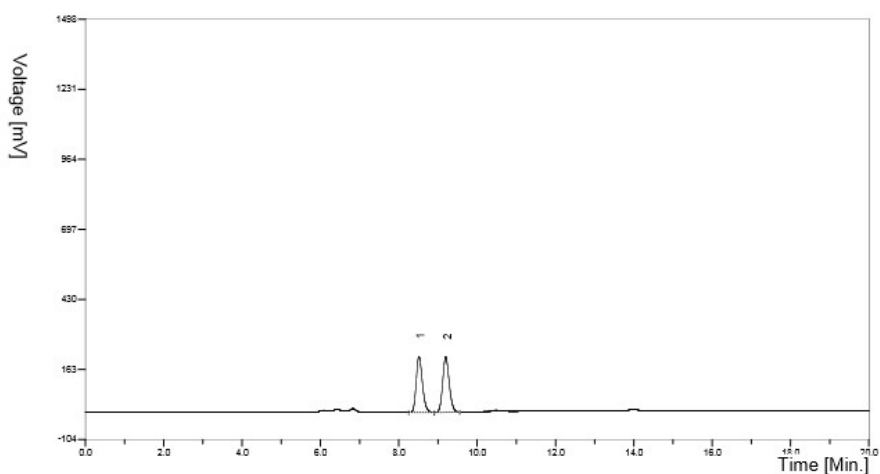

**Integration Result**

| #     | Ret. Time(min) | Area(mv.sec) | Area Percentage(%) |
|-------|----------------|--------------|--------------------|
| 1     | 8.52           | 2325.80      | 49.0189            |
| 2     | 9.20           | 2418.90      | 50.9811            |
| Total |                | 4744.70      | 100                |

**5a**

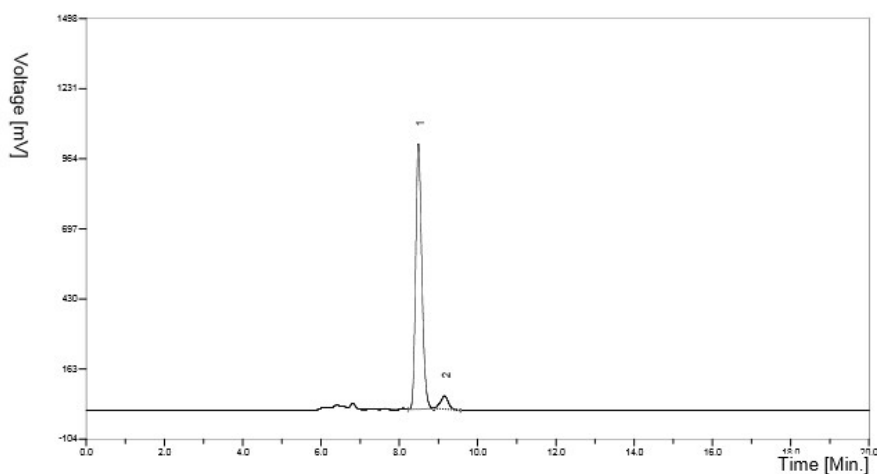

**Integration Result**

| #     | Ret. Time(min) | Area(mv.sec) | Area Percentage(%) |
|-------|----------------|--------------|--------------------|
| 1     | 8.49           | 11059.43     | 94.0314            |
| 2     | 9.16           | 701.99       | 5.9686             |
| Total |                | 11761.43     | 100                |



**Rac-5b**

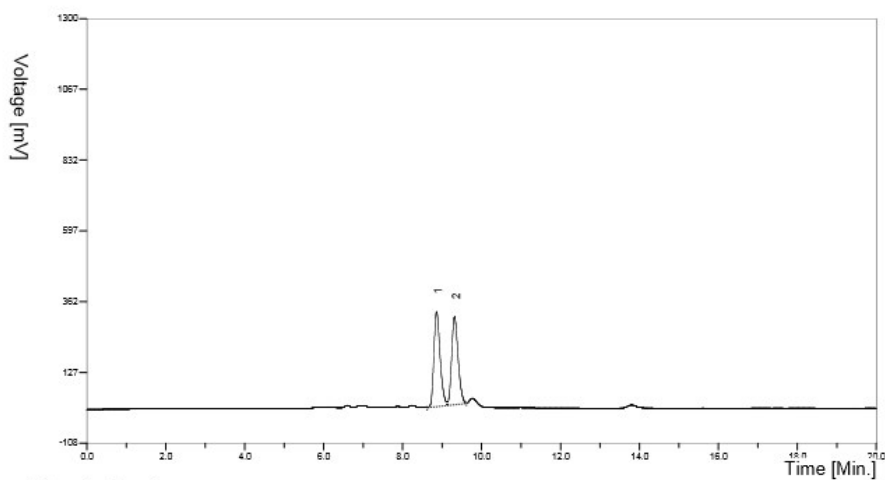

**Integration Result**

| #     | Ret. Time(min) | Area(mv.sec) | Area Percentage(%) |
|-------|----------------|--------------|--------------------|
| 1     | 8.86           | 3443.85      | 50.9988            |
| 2     | 9.32           | 3308.95      | 49.0012            |
| Total |                | 6752.81      | 100                |

**5b**

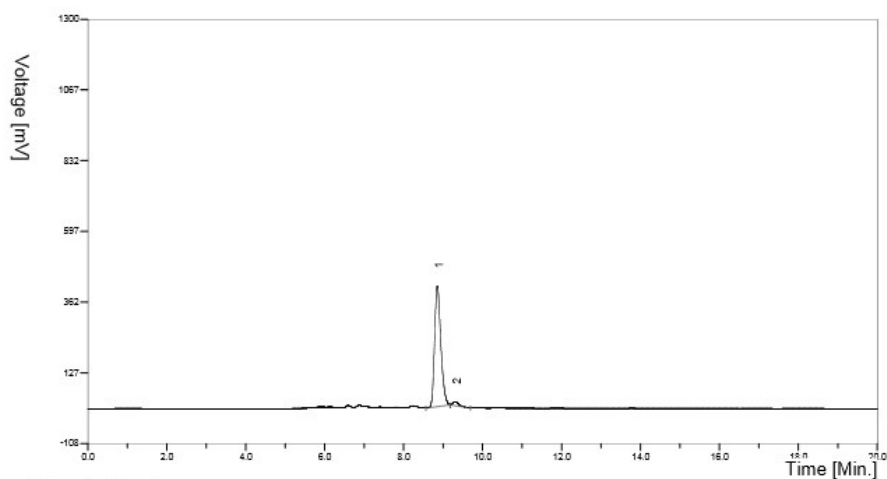

**Integration Result**

| #     | Ret. Time(min) | Area(mv.sec) | Area Percentage(%) |
|-------|----------------|--------------|--------------------|
| 1     | 8.85           | 4393.57      | 97.3516            |
| 2     | 9.31           | 119.52       | 2.6484             |
| Total |                | 4513.09      | 100                |

### Rac-5c

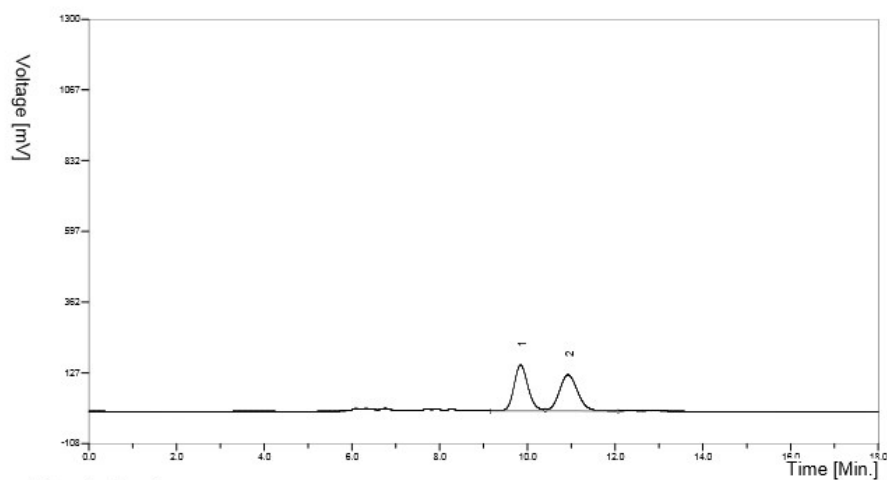

#### Integration Result

| #     | Ret. Time(min) | Area(mv.sec) | Area Percentage(%) |
|-------|----------------|--------------|--------------------|
| 1     | 9.84           | 3355.94      | 49.2198            |
| 2     | 10.93          | 3462.33      | 50.7802            |
| Total |                | 6818.28      | 100                |

### 5c

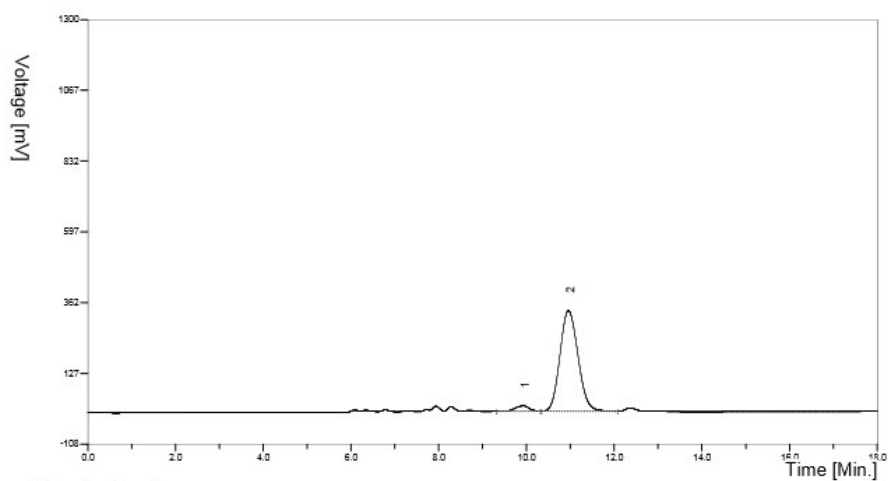

#### Integration Result

| #     | Ret. Time(min) | Area(mv.sec) | Area Percentage(%) |
|-------|----------------|--------------|--------------------|
| 1     | 9.93           | 391.38       | 3.9371             |
| 2     | 10.96          | 9549.31      | 96.0629            |
| Total |                | 9940.69      | 100                |

### Rac-5d

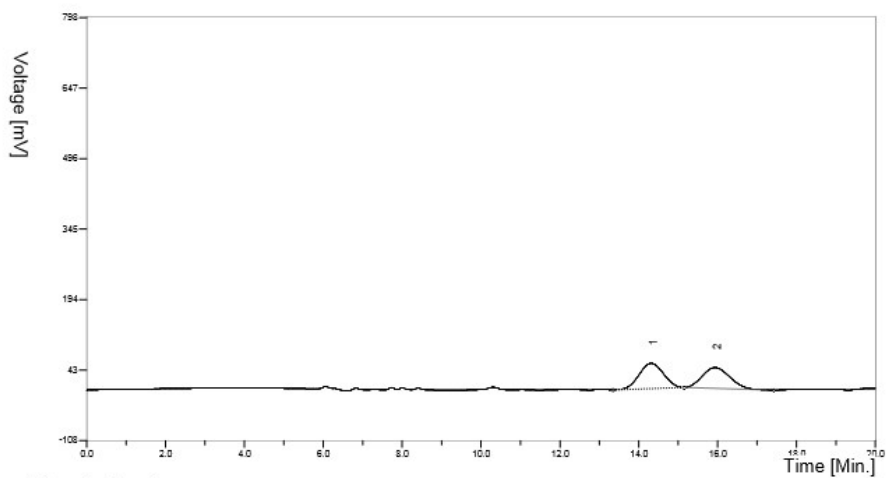

#### Integration Result

| #     | Ret. Time(min) | Area(mv.sec) | Area Percentage(%) |
|-------|----------------|--------------|--------------------|
| 1     | 14.32          | 2317.98      | 51.8815            |
| 2     | 15.94          | 2149.86      | 48.1185            |
| Total |                | 4467.84      | 100                |

### 5d

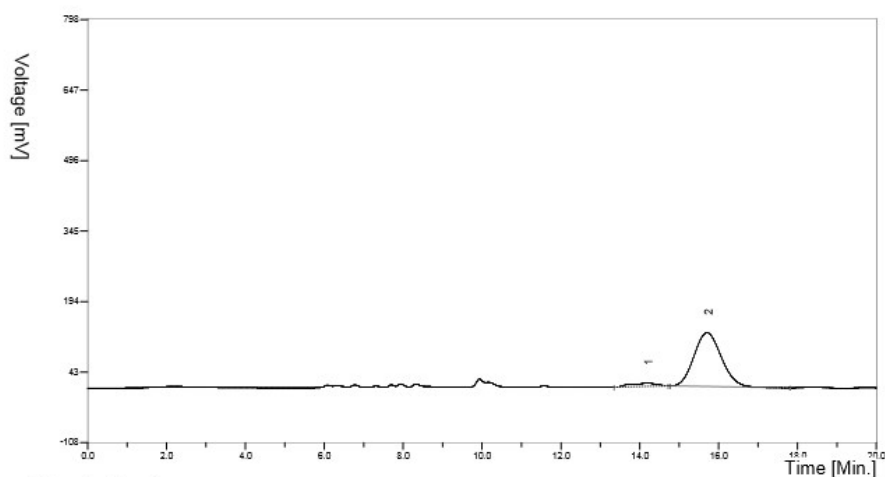

#### Integration Result

| #     | Ret. Time(min) | Area(mv.sec) | Area Percentage(%) |
|-------|----------------|--------------|--------------------|
| 1     | 14.18          | 316.76       | 5.4109             |
| 2     | 15.70          | 5537.36      | 94.5891            |
| Total |                | 5854.13      | 100                |

*Rac-6*

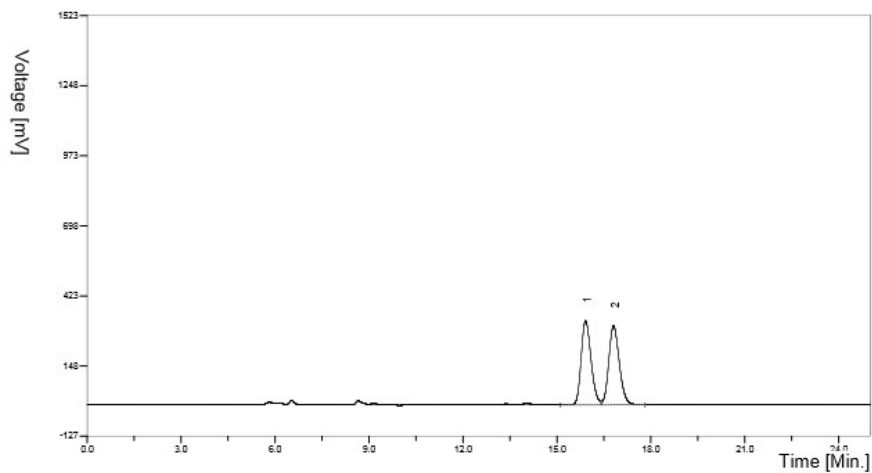

**Integration Result**

| #     | Ret. Time(min) | Area(mv.sec) | Area Percentage(%) |
|-------|----------------|--------------|--------------------|
| 1     | 15.92          | 7198.87      | 49.9173            |
| 2     | 16.81          | 7222.74      | 50.0827            |
| Total |                | 14421.61     | 100                |

**6**

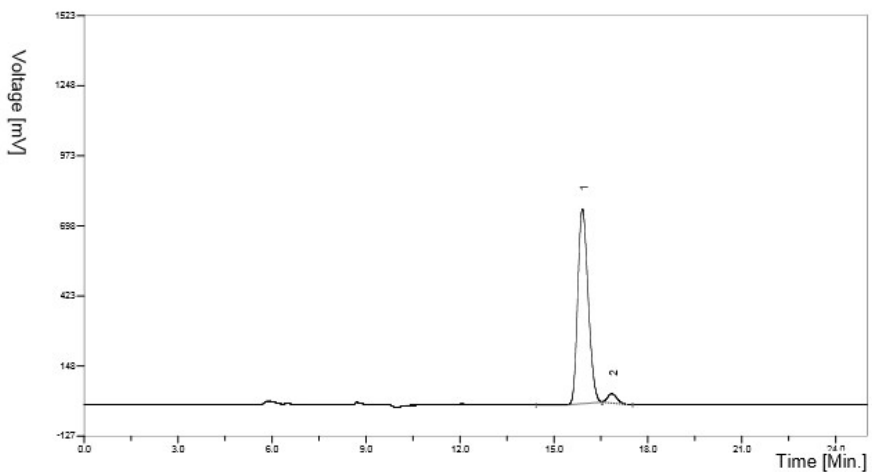

**Integration Result**

| #     | Ret. Time(min) | Area(mv.sec) | Area Percentage(%) |
|-------|----------------|--------------|--------------------|
| 1     | 15.91          | 17337.35     | 95.8916            |
| 2     | 16.85          | 742.80       | 4.1084             |
| Total |                | 18080.15     | 100                |
